# Supplementary material for: Affirmative citation bias in scientific myth debunking: A three-in-one case study
Source: PLoS One. 2019 Sep 9;14(9):e0222213. doi: 10.1371/journal.pone.0222213 (PMC6733478; doi:10.1371/journal.pone.0222213)
Supplement: S1 File — (XLSX) [file pone.0222213.s001.xlsx]

## Sheet: Franke & Kaul 1978
Franke & Kaul 1978							Aff	Neut	Neg	Citing as aff
Burawoy, M.	1979	ANTHROPOLOGY OF INDUSTRIAL WORK	Annual Review of Anthropology	8		231-266		1
Gustavsen, B.	1980	Legal-Administrative Reforms and the Role of Social Research	Acta Sociologica	23	1	2019-03-01		1
Gustavsen, B.	1980	From Satisfaction to Collective Action: Trends in the Development of Research and Reform in Working Life	Economic and Industrial Democracy	1	2	147-170		1
Miller, H. L.	1980	HARD REALITIES AND SOFT SOCIAL-SCIENCE	Public Interest		59	67-82		1
Oreilly, C. A. and Weitz, B. A.	1980	MANAGING MARGINAL EMPLOYEES - THE USE OF WARNINGS AND DISMISSALS	Administrative Science Quarterly	25	3	467-484		1
Parker, R. N.	1980	Correlation In Time Series Regression: The Geary Test	Sociological Methods & Research	9	1	99-114		1
Bartlem, C. S. and Locke, E. A.	1981	The Coch and French Study: A Critique and Reinterpretation	Human Relations	34	7	555-566		1
Boyd, W. L. and Crowson, R. L.	1981	Chapter 7: The Changing Conception and Practice of Public School Administration	Review of Research in Education	9	1	311-373		1
Bramel, D. and Friend, R.	1981	HAWTHORNE, THE MYTH OF THE DOCILE WORKER, AND CLASS BIAS IN PSYCHOLOGY	American Psychologist	36	8	867-878			1
Holzberg, C. S. and Giovannini, M. J.	1981	ANTHROPOLOGY AND INDUSTRY - REAPPRAISAL AND NEW DIRECTIONS	Annual Review of Anthropology	10		317-360		1
Macarov, D.	1981	Humanising the Workplace as Squaring the Circle	International Journal of Manpower	2	3	2014-06-01		1
Pitcher, B. L.	1981	THE HAWTHORNE EXPERIMENTS - STATISTICAL EVIDENCE FOR A LEARNING HYPOTHESIS	Social Forces	60	1	133-149			1
Roman, P. M.	1981	FROM EMPLOYEE ALCOHOLISM TO EMPLOYEE ASSISTANCE - DEEMPHASIS ON PREVENTION AND ALCOHOL-PROBLEMS IN WORK-BASED PROGRAMS	Journal of Studies on Alcohol	42	3	244-272		1
Rossi, P. H. and Berk, R. A.	1981	AN OVERVIEW OF EVALUATION STRATEGIES AND PROCEDURES	Human Organization	40	4	287-299		1
Silver, M. L.	1981	WORKER MANAGEMENT - A POWER-DIALECTIC FRAMEWORK	Sociology of Work and Occupations	8	2	145-164		1
Armstrong, J. S.	1982	Research on scientific journals: Implications for editors and authors	Journal of Forecasting	1	1	83-104			1
MacArav, D.	1982	The Work Personality: A Neglected Element in Research	International Journal of Manpower	3	4	2018-08-02		1
Bloombaum, M.	1983	The hawthorne experiments: A Critique and Reanalysis of the First Statistical Interpretation by Franke and Kaul	Sociological Perspectives	26	1	71-88		1
Sonnenfeld, J.	1983	Commentary: Academic learning, worker learning, and the hawthorne studies	Social Forces	61	3	904-909		1
Adair, J. G.	1984	THE HAWTHORNE EFFECT - A RECONSIDERATION OF THE METHODOLOGICAL ARTIFACT	Journal of Applied Psychology	69	2	334-345	1
Bryman, A.	1984	ORGANIZATION STUDIES AND THE CONCEPT OF RATIONALITY	Journal of Management Studies	21	4	391-408		1
Horwitz, S. M., Morgenstern, H. and Berkman, L. F.	1985	The use of pediatric medical care: A critical review	Journal of Chronic Diseases	38	11	935-945	1			1
Meller, Y. and Macarov, D.	1985	Studying satisfactions in human service organisations: An exploration	International Journal of Sociology and Social Policy	5	2	2015-01-01		1
Sonnenfeld, J. A.	1985	SHEDDING LIGHT ON THE HAWTHORNE STUDIES	Journal of Occupational Behaviour	6	2	111-130		1
Yorks, L. and Whitsett, D. A.	1985	HAWTHORNE, TOPEKA, AND THE ISSUE OF SCIENCE VERSUS ADVOCACY IN ORGANIZATIONAL-BEHAVIOR	Academy of Management Review	10	1	21-30		1
Drago, R.	1986	Capitalism and Efficiency: A Review and Appraisal of the Recent Discussion	Review of Radical Political Economics	18	4	71-92		1
Chambers, E.	1987	APPLIED ANTHROPOLOGY IN THE POST-VIETNAM ERA - ANTICIPATIONS AND IRONIES	Annual Review of Anthropology	16		309-337		1
Eisenberg, E. M. and Witten, M. G.	1987	RECONSIDERING OPENNESS IN ORGANIZATIONAL COMMUNICATION	Academy of Management Review	12	3	418-426		1
Franke, R. H.	1987	Technological revolution and productivity decline: Computer introduction in the financial industry	Technological Forecasting and Social Change	31	2	143-154		1
Smith, J. H.	1987	Elton mayo and the hidden hawthorne	Work Employment &amp; Society	1	1	107-120		1
Gonzales, M. H., Aronson, E. and Costanzo, M. A.	1988	Using Social Cognition and Persuasion to Promote Energy Conservation: A Quasi‐Experiment	Journal of Applied Social Psychology	18	12	1049-1066		1
Macarov, D.	1988	Quitting Time: The End of Work	International Journal of Sociology and Social Policy	8	2018-04-02	1-181		1
Wagner Iii, J. A., Rubin, P. A. and Callahan, T. J.	1988	Incentive payment and nonmanagerial productivity: An interrupted time series analysis of magnitude and trend	Organizational Behavior and Human Decision Processes	42	1	47-74		1
Oreilly, C. A. and Puffer, S. M.	1989	THE IMPACT OF REWARDS AND PUNISHMENTS IN A SOCIAL-CONTEXT - A LABORATORY AND FIELD EXPERIMENT	Journal of Occupational Psychology	62	1	41-53		1
Jones, S. R. G.	1990	WORKER INTERDEPENDENCE AND OUTPUT - THE HAWTHORNE STUDIES REEVALUATED	American Sociological Review	55	2	176-190		1
Rau, W. and Heyl, B. S.	1990	HUMANIZING THE COLLEGE CLASSROOM - COLLABORATIVE LEARNING AND SOCIAL-ORGANIZATION AMONG STUDENTS	Teaching Sociology	18	2	141-155		1
Gowen, C. R. and Jennings, S. A.	1991	The effects of changes in participation and group size on gainsharing success: A case study	Journal of Organizational Behavior Management	11	2	147-169		1
Nelson, E. W., Van Cleve, S., Swartz, M. K., Kessen, W. and McCarthy, P. L.	1991	Improving the Use of Early Follow-up Care After Emergency Department Visits: A Randomized Trial	American Journal of Diseases of Children	145	4	440-444	1			1
Wadhwani, S. B. and Wall, M.	1991	A direct test of the efficiency wage model using uk micro-data	Oxford Economic Papers	43	4	529-548		1
Walters, J. P.	1991	Role-Playing Analytical Chemistry Laboratories	Analytical Chemistry	63	20	977 A-985 A		1
Jones, S. R. G.	1992	WAS THERE A HAWTHORNE EFFECT	American Journal of Sociology	98	3	451-468			1
Bolton, A. A.	1994	Relay assembly testroom participants remember: Hawthorne a half century later	International Journal of Public Administration	17	2	255-457		1
Clair, R. P.	1994	Resistance and oppression as a self‐contained opposite: An organizational communication analysis of one man's story of sexual harassment	Western Journal of Communication	58	4	235-262		1
Hubbard, R. and Armstrong, J. S.	1994	Replications and extensions in marketing: Rarely published but quite contrary	International Journal of Research in Marketing	11	3	233-248			1
Meyer, B. D.	1995	LESSONS FROM THE UNITED-STATES UNEMPLOYMENT-INSURANCE EXPERIMENTS	Journal of Economic Literature	33	1	91-131	1
Gottfredson, G. D.	1996	The Hawthorne misunderstanding (and how to get the Hawthorne effect in action research)	Journal of Research in Crime and Delinquency	33	1	28-48	1
Hubbard, R. and Vetter, D. E.	1996	An empirical comparison of published replication research in accounting, economics, finance, management, and marketing	Journal of Business Research	35	2	153-164			1
Mumby, D. K. and Stohl, C.	1996	Disciplining organizational communication studies	Management Communication Quarterly	10	1	50-72		1
Campanario, J. M.	1998	Peer review for journals as it stands today - Part 2	Science Communication	19	4	277-306		1
Hubbard, R., Vetter, D. E. and Little, E. L.	1998	Replication in strategic management: Scientific testing for validity, generalizability, and usefulness	Strategic Management Journal	19	3	243-254			1
Moldaschl, M. and Weber, W. G.	1998	The "three waves" of industrial group work: Historical reflections on current research on group work	Human Relations	51	3	347-388			1
Russell, I. J.	1998	The reliability of algometry in the assessment of patients with fibromyalgia syndrome	Journal of Musculoskeletal Pain	6	1	139-152	1			1
Walsh, J. P. and Tseng, S. F.	1998	The effects of job characteristics on active effort at work	Work and Occupations	25	1	74-96		1
Highhouse, S.	1999	The brief history of personnel counseling in industrial-organizational psychology	Journal of Vocational Behavior	55	3	318-336		1
Tsang, E. W. K. and Kwan, K. M.	1999	Replication and theory development in organizational science: A critical realist perspective	Academy of Management Review	24	4	759-780		1
Dafermos, G. N.	2001	Management and virtual decentralised networks: The Linux Project	First Monday	6	11			1
Lewin, D.	2001	IR and HR perspectives on workplace conflict what can each learn from the other?	Human Resource Management Review	11	4	453-485		1
Murero, M., D'Ancona, G. and Karamanoukian, H.	2001	Use of the Internet by patients before and after cardiac surgery: Telephone survey	Journal of Medical Internet Research	3	3	28-34	1			1
Shapiro, B. and Baker, C. R.	2001	Information technology and the social construction of information privacy	Journal of Accounting and Public Policy	20	2018-05-04	295-322	1			1
Hsueh, Y.	2002	The Hawthorne Experiments and the Introduction of Jean Piaget in American Industrial Psychology, 1929-1932	History of Psychology	5	2	163-189		1
Alexander, W. R. J. and McDougall, R. S.	2003	Changing the tutorial experience in introductory economics	New Zealand Economic Papers	37	2	269-283	1			1
Burawoy, M.	2003	Revisits: An outline of a theory of reflexive ethnography	American Sociological Review	68	5	645-679		1
Smith, M. W. and Barnett, P. G.	2003	Direct measurement of health care costs	Medical Care Research and Review	60	3	74S-91S	1			1
Jain, A., Finer, N. N., Hilton, S. and Rich, W.	2004	A randomized trial of suprasternal palpation to determine endotracheal tube position in neonates	Resuscitation	60	3	297-302	1			1
Mitchell, G. G. and Delaney, J. D.	2004	An assessment strategy to determine learning outcomes in a software engineering Problem-based learning course	International Journal of Engineering Education	20	3	494-502	1			1
Mufson, L. H., Dorta, K. P., Olfson, M., Weissman, M. M. and Hoagwood, K.	2004	Effectiveness research: Transporting Interpersonal Psychotherapy for Depressed Adolescents (IPT-A) from the lab to school-based health clinics	Clinical Child and Family Psychology Review	7	4	251-261	1			1
Oakes, J. M.	2004	The (mis)estimation of neighborhood effects: causal inference for a practicable social epidemiology	Social Science & Medicine	58	10	1929-1952		1
Peper, E., Gibney, K. H. and Wilson, V. E.	2004	Group training with healthy computing practices to prevent repetitive strain injury (RSI): A preliminary study	Applied Psychophysiology and Biofeedback	29	4	279-287	1			1
Tetnowski, J. A. and Damico, J. S.	2004	Getting out of Procrustes' bed: The needs and benefits of qualitative research in stuttering	International Journal of Speech-Language Pathology	6	3	153-158	1			1
Winn, G. L., Baldwin, J. C. and Seaman, B.	2004	Fall protection incentives in the construction industry: Literature review and field study	International Journal of Occupational Safety and Ergonomics	10	1	2018-11-05	1			1
Bulstrode, C., Hunt, V., Hamilton, L., Briggs, T. and Hilton, C.	2005	Retraining: Can do, will do? A practical guide to process and pitfalls	Surgeon	3	4	261-264	1			1
Dafermos, G. N.	2005	Management and virtual decentralised networks: The linux project	First Monday	10	SPEC. ISS. 2			1
Kumar, A. N.	2005	Generation of Problems, Answers, Grade, and Feedback - Case Study of a Fully Automated Tutor	ACM Journal on Educational Resources in Computing	5	3	3	1			1
Nathoo, A. N., Goldhoff, P. and Quattrochi, J. J.	2005	Evaluation of an interactive case-based online network (ICON) in a problem based learning environment	Advances in Health Sciences Education	10	3	215-230	1			1
Rinchuse, D. J., Sweitzer, E. M., Rinchuse, D. J. and Rinchuse, D. L.	2005	Understanding science and evidence-based decision making in orthodontics	American Journal of Orthodontics and Dentofacial Orthopedics	127	5	618-624	1
Wright, C. Y. and Reeder, A. I.	2005	Youth solar ultraviolet radiation exposure, concurrent activities and sun-protective practices: A review	Photochemistry and Photobiology	81	6	1331-1342	1			1
Hansson, M. and Wigblad, R.	2006	Recontextualizing the Hawthorne effect	Scandinavian Journal of Management	22	2	120-137	1
Kompier, M. A. J.	2006	The "Hawthorne effect" is a myth, but what keeps the story going?	Scandinavian Journal of Work Environment & Health	32	5	402-412			1
Kushner, B. J.	2006	Perspective on strabismus, 2006	Archives of Ophthalmology	124	9	1321-1326	1			1
Liu, N., Chazot, T., Genty, A., Landais, A., Restoux, A., McGee, K., Laloë, P. A., Trillat, B., Barvais, L. and Fischler, M.	2006	Titration of propofol for anesthetic induction and maintenance guided by the bispectral index: Closed-loop versus manual control. A prospective, randomized, multicenter study	Anesthesiology	104	4	686-695	1			1
Mas, M.	2006	The placebo effect in andrology	Revista Internacional de Andrologia	4	2	74-85	1			1
Meade, C. M., Bursell, A. L. and Ketelsen, L.	2006	Effects of nursing rounds on patients' call light use, satisfaction, and safety	American Journal of Nursing	106	9	58-70	1			1
Pomerantz, J., Luo, L. L. and McClure, C. R.	2006	Peer review of chat reference transcripts: Approaches and strategies	Library & Information Science Research	28	1	24-48	1			1
Renaud, K., Ramsay, J. and Hair, M.	2006	You've got e-mail!... shall I deal with it now? Electronic mail from the recipient's perspective	International Journal of Human-Computer Interaction	21	3	313-332		1
Schaafsma, F., Hulshof, C., de Boer, A., Hackmann, R., Roest, N. and van Dijk, F.	2006	Occupational physicians: what are their questions in daily practice? An observation study	Occupational Medicine-Oxford	56	3	191-198	1			1
Taitz, J., Wyeth, B., Lennon, R., Torre, P. D., Yen, T., Harrison, B. and Cattell, M.	2006	Effect of the introduction of a lumbar-puncture sticker and teaching manikin on junior staff documentation and performance of paediatric lumbar punctures	Quality & Safety in Health Care	15	5	325-328	1			1
Tarn, D. M., Paterniti, D. A., Heritage, J., Hays, R. D., Kravitz, R. L. and Wenger, N. S.	2006	Physician communication about the cost and acquisition of newly prescribed medications	American Journal of Managed Care	12	11	657-664	1			1
Wagar, E. A., Tamashiro, L., Yasin, B., Hilborne, L. and Bruckner, D. A.	2006	Patient safety in the clinical laboratory: A longitudinal analysis of specimen identification errors	Archives of Pathology and Laboratory Medicine	130	11	1662-1668	1			1
Wu, C. F., Jimenez, J., Claiborn, C., Gould, T., Simpson, C. D., Larson, T. and Sally Liu, L. J.	2006	Agricultural burning smoke in Eastern Washington: Part II. Exposure assessment	Atmospheric Environment	40	28	5379-5392	1			1
Arora, V., Kao, J., Lovinger, D., Seiden, S. C. and Meltzer, D.	2007	Medication discrepancies in resident sign-outs and their potential to harm	Journal of General Internal Medicine	22	12	1751-1755	1			1
Bayston, R., Ashraf, W. and Fisher, L.	2007	Prevention of infection in neurosurgery: role of "antimicrobial" catheters	Journal of Hospital Infection	65		39-42	1			1
Breen, R., Pyper, S., Rusk, Y. and Dockrell, S.	2007	An investigation of children's posture and discomfort during computer use	Ergonomics	50	10	1582-1592	1			1
Emmerson, B., Fawcett, L., Ward, W., Catts, S., Ng, A. and Frost, A.	2007	Contemporary management of aggression in an inner city mental health service	Australasian Psychiatry	15	2	115-119	1			1
Grant, A. M., Campbell, E. M., Chen, G., Cottone, K., Lapedis, D. and Lee, K.	2007	Impact and the art of motivation maintenance: The effects of contact with beneficiaries on persistence behavior	Organizational Behavior and Human Decision Processes	103	1	53-67	1			1
Greenberg, J. A., Irani, J. L., Greenberg, C. C., Blanco, M. A., Lipsitz, S., Ashley, S. W., Breen, E. M. and Hafler, J. P.	2007	The ACGME competencies in the operating room	Surgery	142	2	180-184	1			1
Grønningsæter, I., Hallås, O., Kristiansen, T. and Nævdal, F.	2007	Physical activity in school for 11 - 12 Year-olds	Tidsskrift for den Norske Laegeforening	127	22	2927-2929	1			1
Lane, J., Turner, S., Fain, T. and Sehgal, A.	2007	Implementing "corrections of place" ideas: The perspective of clients and staff	Criminal Justice and Behavior	34	1	76-95		1
McCarney, R., Warner, J., Iliffe, S., van Haselen, R., Griffin, M. and Fisher, P.	2007	The Hawthorne Effect: a randomised, controlled trial	Bmc Medical Research Methodology	7			1			1
Terceros, Y., Chahine-Chakhtoura, C., Malinowski, J. E. and Rickley, W. F.	2007	Impact of a pharmacy resident on hospital length of stay and drug-related costs	Annals of Pharmacotherapy	41	5	742-748	1			1
Wagar, E. A., Stankovic, A. K., Wilkinson, D. S., Walsh, M. and Souers, R. J.	2007	Assessment monitoring of laboratory critical values: A College of American Pathologists Q-tracks study of 180 institutions	Archives of Pathology and Laboratory Medicine	131	1	44-49	1			1
Williamson, K. M.	2007	Home health care nurses' perceptions of empowerment	Journal of Community Health Nursing	24	3	133-153	1			1
Wright, C. Y., Reeder, A. I., Bodeker, G. E., Gray, A. and Cox, B.	2007	Solar UVR exposure, concurrent activities and sun-protective practices among primary schoolchildren	Photochemistry and Photobiology	83	3	749-758	1			1
Yang, G. and Chin, R.	2007	Assessment of teacher interruptions on learners during oral case presentations	Academic Emergency Medicine	14	6	521-525	1			1
Belknap, S. M., Moore, H., Lanzotti, S. A., Yarnold, P. R., Getz, M., Deitrick, D. L., Peterson, A., Akeson, J., Maurer, T., Soltysik, R. C., Storm, G. A. and Brooks, I.	2008	Application of software design principles and debugging methods to an analgesia prescription reduces risk of severe injury from medical use of opioids	Clinical Pharmacology & Therapeutics	84	3	385-392	1			1
Burawoy, M.	2008	The Public Turn From Labor Process to Labor Movement	Work and Occupations	35	4	371-387		1
Chiesa, M. and Hobbs, S.	2008	Making sense of social research: How useful is the Hawthorne Effect?	European Journal of Social Psychology	38	1	67-74			1
Dupuis, O.	2008	Operative vaginal deliveries training	Journal De Gynecologie Obstetrique Et Biologie De La Reproduction	37	8	S288-S296	1			1
Dupuis, O., Sayegh, I., Decullier, E., Dupont, C., Clément, H. J., Berland, M. and Rudigoz, R. C.	2008	Red, orange and green Caesarean sections: A new communication tool for on-call obstetricians	European Journal of Obstetrics Gynecology and Reproductive Biology	140	2	206-211	1			1
Finkelstein, J., Lapshin, O. and Wasserman, E.	2008	Randomized study of different anti-stigma media	Patient Education and Counseling	71	2	204-214	1			1
Grant, A. M.	2008	The significance of task significance: Job performance effects, relational mechanisms, and boundary conditions	Journal of Applied Psychology	93	1	108-124	1			1
Hogan, B., Hershey, L., Hogan, R. and Callum, C.	2008	Using a sponsorship to improve the success of blood drive donations	Health Marketing Quarterly	24	2018-02-01	51-61	1			1
Maudgalya, T., Genaidy, A. and Shell, R.	2008	Productivity-quality-costs-safety: A sustained approach to competitive advantage - A systematic review of the National Safety Council's case studies in safety and productivity	Human Factors and Ergonomics in Manufacturing	18	2	152-179	1			1
Naughton, F., Prevost, A. T. and Sutton, S.	2008	Self-help smoking cessation interventions in pregnancy: a systematic review and meta-analysis	Addiction	103	4	566-579	1			1
Singh, S., Midha, S., Singh, N., Joshi, Y. K. and Garg, P. K.	2008	Dietary counseling versus dietary supplements for malnutrition in chronic pancreatitis: A randomized controlled trial	Clinical Gastroenterology and Hepatology	6	3	353-359	1			1
Wright, M. and Armstrong, J. S.	2008	The Ombudsman: Verification of citations: Fawlty Towers of knowledge?	Interfaces	38	2	125-132		1
Agarwal, J., Puri, G. D. and Mathew, P. J.	2009	Comparison of closed loop vs. manual administration of propofol using the Bispectral index in cardiac surgery	Acta Anaesthesiologica Scandinavica	53	3	390-397	1			1
Andrade, C. and Radhakrishnan, R.	2009	Prayer and healing: A medical and scientific perspective on randomized controlled trials	Indian Journal of Psychiatry	51	4	247-253	1			1
Bosman, R. J.	2009	Impact of computerized information systems on workload in operating room and intensive care unit	Best Practice and Research: Clinical Anaesthesiology	23	1	15-26	1			1
Garcia, D. A., Highfill, J., Finnerty, K., Varoz, E., McConkey, S., Hutchinson, K. and Libby, E.	2009	A prospective, controlled trial of a pharmacy-driven alert system to increase thromboprophylaxis rates in medical inpatients	Blood Coagulation & Fibrinolysis	20	7	541-545	1			1
He, Q. F. and Anton, A. I.	2009	Requirements-based Access Control Analysis and Policy Specification (ReCAPS)	Information and Software Technology	51	6	993-1009	1			1
Huissoud, C., du Mesnildot, P., Sayegh, I., Dupuis, O., Clément, H. J., Thévenet, S., Dubernard, G. and Rudigoz, R. C.	2009	Color-codes implementation shortens the decision-to-delivery interval of emergency C-sections	Journal de Gynecologie Obstetrique et Biologie de la Reproduction	38	1	51-59	1			1
Kucher, N., Puck, M., Blaser, J., Bucklar, G., Eschmann, E. and Lüscher, T. F.	2009	Physician compliance with advanced electronic alerts for preventing venous thromboembolism among hospitalized medical patients	Journal of Thrombosis and Haemostasis	7	8	1291-1296	1			1
Marín-Jiménez, I.	2009	The placebo effect in inflammatory bowel disease	Gastroenterologia y Hepatologia	32	SUPPL. 2	44-49	1			1
Pehkonen, I., Miranda, H., Haukka, E., Luukkonen, R., Takala, E. P., Ketola, R., Leino-Arjas, P., Riihimäki, H. and Viikari-Juntura, E.	2009	Prospective study on shoulder symptoms among kitchen workers in relation to self-perceived and observed work load	Occupational and Environmental Medicine	66	6	416-423	1			1
Resnic, F. S. and Welt, F. G. P.	2009	The Public Health Hazards of Risk Avoidance Associated With Public Reporting of Risk-Adjusted Outcomes in Coronary Intervention	Journal of the American College of Cardiology	53	10	825-830	1			1
Burke, C. K., Maton, K. I., Mankowski, E. S. and Anderson, C.	2010	Healing Men and Community: Predictors of Outcome in a Men's Initiatory and Support Organization	American Journal of Community Psychology	45	2018-02-01	186-200	1			1
Choi, Y. K.	2010	The effect of music and progressive muscle relaxation on anxiety, fatigue, and quality of life in family caregivers of hospice patients	Journal of Music Therapy	47	1	53-69	1			1
Dulko, D., Hertz, E., Julien, J., Beck, S. and Mooney, K.	2010	Implementation of cancer pain guidelines by acute care nurse practitioners using an audit and feedback strategy	Journal of the American Academy of Nurse Practitioners	22	1	45-55	1			1
Elliot, D. L., Kerry, K. S., Moe, E. L., DeFrancesco, C. A., Goldberg, L., MacKinnon, D. P., Enders, J. and Favorite, K. C.	2010	The IGNITE (investigation to guide new insight into translational effectiveness) trial: Protocol for a translational study of an evidenced-based wellness program in fire departments	Implementation Science	5			1			1
Emery, M.	2010	When the cure is the cause: The turnover and absenteeism problems	Innovation Journal	15	1	2017-01-01			1
Hemmerling, T. M., Charabati, S., Zaouter, C., Minardi, C. and Mathieu, P. A.	2010	A randomized controlled trial demonstrates that a novel closed-loop propofol system performs better hypnosis control than manual administration	Canadian Journal of Anesthesia-Journal Canadien D Anesthesie	57	8	725-735	1			1
Huissoud, C., Dupont, C., Canoui-Poitrine, F., Touzet, S., Dubernard, G. and Rudigoz, R. C.	2010	Decision-to-delivery interval for emergency caesareans in the Aurore perinatal network	European Journal of Obstetrics & Gynecology and Reproductive Biology	149	2	159-164	1			1
Inamori, T. and Analoui, F.	2010	Beyond Pygmalion effect: the role of managerial perception	Journal of Management Development	29	4	306-321	1			1
Irani, J. L., Greenberg, J. A., Blanco, M. A., Greenberg, C. C., Ashley, S., Lipsitz, S. R., Hafler, J. P. and Breen, E.	2010	Educational value of the operating room experience during a core surgical clerkship	American Journal of Surgery	200	1	167-172	1			1
Jamieson, L. H., Scally, A. J. and Chrystyn, H.	2010	A randomised comparison of practice pharmacist-managed hypertension providing Level 3 Medication Review versus usual care in general practice	Journal of Applied Therapeutic Research	7	3	77-86	1			1
Lau, R., Stewart, K., McNamara, K. P., Jackson, S. L., Hughes, J. D., Peterson, G. M., Bortoletto, D. A., McDowell, J., Bailey, M. J., Hsueh, A. and George, J.	2010	Evaluation of a community pharmacy-based intervention for improving patient adherence to antihypertensives: a randomised controlled trial	Bmc Health Services Research	10			1			1
Molenaar, I., van Boxtel, C. A. M. and Sleegers, P. J. C.	2010	The effects of scaffolding metacognitive activities in small groups	Computers in Human Behavior	26	6	1727-1738	1			1
Sellem, E., Rouland, J. F., Baudouin, C., Bron, A., Denis, P., Nordmann, J. P. and Renard, J. P.	2010	Predictors of additional intraocular pressure reduction in patients changed to latanoprost/timolol fixed combination	Bmc Ophthalmology	10			1			1
Wolfe, F. and Michaud, K.	2010	The Hawthorne Effect, Sponsored Trials, and the Overestimation of Treatment Effectiveness	Journal of Rheumatology	37	11	2216-2220	1			1
Yager, Z. and O'Dea, J.	2010	A controlled intervention to promote a healthy body image, reduce eating disorder risk and prevent excessive exercise among trainee health education and physical education teachers	Health Education Research	25	5	841-852	1			1
Beeler, P. E., Kucher, N. and Blaser, J.	2011	Sustained impact of electronic alerts on rate of prophylaxis against venous thromboembolism	Thrombosis and Haemostasis	106	4	734-738	1			1
Borgonjen, R. J., Van Everdingen, J. J., Bik, C. M., Tuut, M. K., Spuls, P. I. and Van De Kerkhof, P. C.	2011	Prospective comparison of three guideline development methods for treatment of actinic keratosis	BMJ Quality and Safety	20	10	832-841	1			1
De Luca, K., Pollard, H., Brantingham, J., Globe, G. and Cassa, T.	2011	A randomized controlled trial of chiropractic management of the lower limb kinetic chain for the treatment of hip osteoarthritis: A study protocol	Journal of Chiropractic Medicine	10	2	86-92	1			1
Frey, R., Gott, M. and Banfield, R.	2011	What indicators are measured by tools designed to address palliative care competence among 'generalist' palliative care providers? a critical literature review	Progress in Palliative Care	19	3	114-124	1			1
Izawa, M. R., French, M. D. and Hedge, A.	2011	Shining New Light on the Hawthorne Illumination Experiments	Human Factors	53	5	528-547			1
Levitt, S. D. and List, J. A.	2011	Was There Really a Hawthorne Effect at the Hawthorne Plant? An Analysis of the Original Illumination Experiments	American Economic Journal-Applied Economics	3	1	224-238			1
Molenaar, I., Chiu, M. M., Sleegers, P. and van Boxtel, C.	2011	Scaffolding of small groups' metacognitive activities with an avatar	International Journal of Computer-Supported Collaborative Learning	6	4	601-624	1			1
Molenaar, I., van Boxtel, C. A. M. and Sleegers, P. J. C.	2011	Metacognitive scaffolding in an innovative learning arrangement	Instructional Science	39	6	785-803	1			1
Nagpal, K., Abboudi, M., Fischler, L., Schmidt, T., Vats, A., Manchanda, C., Sevdalis, N., Scheidegger, D., Vincent, C. and Moorthy, K.	2011	Evaluation of Postoperative Handover Using a Tool to Assess Information Transfer and Teamwork	Annals of Surgery	253	4	831-837	1			1
Padwal, R. S., Damjanovic, S., Schulze, K. M., Lewanczuk, R. Z., Lau, D. C. W. and Sharma, A. M.	2011	Canadian physicians' use of Antiobesity drugs and their referral patterns to weight management programs or providers: The soccer study	Journal of Obesity	2011			1			1
Pockett, C. R. and Thompson, G. C.	2011	Adherence of Families to a Group A Streptococcal Pharyngitis Protocol Used in a Pediatric Emergency Department	Pediatric Emergency Care	27	5	374-378	1			1
Spigner, C., Lyles, C. R., Galvin, G., Sabin, J., Davis, C., Dick, A. and Young, B. A.	2011	A qualitative assessment of personal and social responsibility for kidney disease: The increasing kidney disease awareness network transplant project	Journal of the National Medical Association	103	2018-10-09	879-884	1			1
Veerbeek, L., van der Geest, L., Wouters, M., Guicherit, O., Does-den Heijer, A., Nortier, J., Marinelli, A., Tollenaar, R. and Struikmans, H.	2011	Enhancing the quality of care for patients with breast cancer: Seven years of experience with a Dutch auditing system	Ejso	37	8	714-718	1			1
Weiner, B. H.	2011	Accreditation of cardiovascular excellence offers outcomes based on multispecialty accreditation for endovascular procedures	US Cardiology	8	1	16-18		1
Beasley, S., Ford, N., Tracy, S. K. and Welsh, A. W.	2012	Collaboration in Maternity Care is achievable and practical	Australian & New Zealand Journal of Obstetrics & Gynaecology	52	6	576-581	1			1
DeSalvo, D. J., Greenberg, L. W., Henderson, C. L. and Cogen, F. R.	2012	A Learner-Centered Diabetes Management Curriculum Reducing resident errors on an inpatient diabetes pathway	Diabetes Care	35	11	2188-2193	1			1
Ferrando, M., Galdón, M. J., Durá, E., Andreu, Y., Jiménez, Y. and Poveda, R.	2012	Enhancing the efficacy of treatment for temporomandibular patients with muscular diagnosis through cognitive-behavioral intervention, including hypnosis: A randomized study	Oral Surgery, Oral Medicine, Oral Pathology and Oral Radiology	113	1	81-89	1			1
Gallas, B. D., Chan, H. P., D'Orsi, C. J., Dodd, L. E., Giger, M. L., Gur, D., Krupinski, E. A., Metz, C. E., Myers, K. J., Obuchowski, N. A., Sahiner, B., Toledano, A. Y. and Zuley, M. L.	2012	Evaluating Imaging and Computer-aided Detection and Diagnosis Devices at the FDA	Academic Radiology	19	4	463-477	1			1
Guillamondegui, O. D., Gunter, O. L., Hines, L., Martin, B. J., Gibson, W., Clarke, P. C., Cecil, W. T. and Cofer, J. B.	2012	Using the National Surgical Quality Improvement Program and the Tennessee Surgical Quality Collaborative to Improve Surgical Outcomes	Journal of the American College of Surgeons	214	4	709-714	1			1
Hassard, J. S.	2012	Rethinking the Hawthorne Studies: The Western Electric research in its social, political and historical context	Human Relations	65	11	1431-1461		1
Lassen, K., Coolsen, M. M. E., Slim, K., Carli, F., de Aguilar-Nascimento, J. E., Schäfer, M., Parks, R. W., Fearon, K. C. H., Lobo, D. N., Demartines, N., Braga, M., Ljungqvist, O. and Dejong, C. H. C.	2012	Guidelines for perioperative care for pancreaticoduodenectomy: Enhanced Recovery After Surgery (ERAS®) Society recommendations	Clinical Nutrition	31	6	817-830	1			1
Maggio, M. P., Hariton-Gross, K. and Gluch, J.	2012	The Use of Independent, Interactive Media for Education in Dental Morphology	Journal of Dental Education	76	11	1497-1511	1			1
Martin, S.	2012	Does instructional format really matter? Cognitive load theory, multimedia and teaching English Literature	Educational Research and Evaluation	18	2	125-152	1			1
Mathisen, P.	2012	Video feedback in higher education - a contribution to improving the quality of written feedback	Nordic Journal of Digital Literacy	2012	2	97-113	1			1
Mertens, W. C., Christov, S. C., Avrunin, G. S., Clarke, L. A., Osterweil, L. J., Cassells, L. J. and Marquard, J. L.	2012	Using process elicitation and validation to understand and improve chemotherapy ordering and delivery	Joint Commission Journal on Quality and Patient Safety	38	11	497-505	1			1
Mitchell, J. D., Collen, J. F., Petteys, S. and Holley, A. B.	2012	A simple reminder system improves venous thromboembolism prophylaxis rates and reduces thrombotic events for hospitalized patients	Journal of Thrombosis and Haemostasis	10	2	236-243	1			1
Molenaar, I., Roda, C., van Boxtel, C. and Sleegers, P.	2012	Dynamic scaffolding of socially regulated learning in a computer-based learning environment	Computers & Education	59	2	515-523	1			1
Odeny, T. A., Bailey, R. C., Bukusi, E. A., Simoni, J. M., Tapia, K. A., Yuhas, K., Holmes, K. K. and McClelland, R. S.	2012	Text Messaging to Improve Attendance at Post-Operative Clinic Visits after Adult Male Circumcision for HIV Prevention: A Randomized Controlled Trial	Plos One	7	9		1			1
Ortega, G., Rhee, D. S., Papandria, D. J., Yang, J., Ibrahim, A. M., Shore, A. D., Makary, M. A. and Abdullah, F.	2012	An Evaluation of Surgical Site Infections by Wound Classification System Using the ACS-NSQIP	Journal of Surgical Research	174	1	33-38	1			1
Potters, L. and Kapur, A.	2012	Implementation of a No Fly safety culture in a multicenter radiation medicine department	Practical Radiation Oncology	2	1	18-26	1			1
Rehn, M., Lossius, H. M., Tjosevik, K. E., Vetrhus, M., Ostebo, O., Eken, T. and Rogaland Trauma Syst Study, Collabo	2012	Efficacy of a two-tiered trauma team activation protocol in a Norwegian trauma centre	British Journal of Surgery	99	2	199-208	1			1
Roux, C., Giraudeau, B., Rouanet, S., Dubourg, G., Perrodeau, E. and Ravaud, P.	2012	Monitoring of bone turnover markers does not improve persistence with ibandronate treatment	Joint Bone Spine	79	4	389-392	1			1
Rybkowski, Z. K., Zhou, X., Lavy, S. and Fernández-Solís, J.	2012	Investigation into the nature of productivity gains observed during the airplane game lean simulation	Lean Construction Journal	2012		78-90	1			1
Sever, P. S.	2012	The Anglo-Scandinavian Cardiac Outcomes Trial Implications and Further Outcomes	Hypertension	60	2	248-+	1			1
Smith, S. E., Tallentire, V. R., Spiller, J., Wood, S. M. and Cameron, H. S.	2012	The educational value of using cumulative sum charts	Anaesthesia	67	7	734-740	1			1
Tarn, D. M., Mattimore, T. J., Bell, D. S., Kravitz, R. L. and Wenger, N. S.	2012	Provider Views About Responsibility for Medication Adherence and Content of Physician-Older Patient Discussions	Journal of the American Geriatrics Society	60	6	1019-1026	1			1
Ting, T. V., Kudalkar, D., Nelson, S., Cortina, S., Pendl, J., Budhani, S., Neville, J., Taylor, J., Huggins, J., Drotar, D. and Brunner, H. I.	2012	Usefulness of Cellular Text Messaging for Improving Adherence Among Adolescents and Young Adults with Systemic Lupus Erythematosus	Journal of Rheumatology	39	1	174-179	1
Tsirikas, A. N., Katsaros, K. K. and Nicolaidis, C. S.	2012	Knowledge management, tolerance of ambiguity and productivity Evidence from the Greek public sector	Employee Relations	34	4	344-359	1			1
van Hoof, J., Westerlaken, A. C., Aarts, M. P. J., Wouters, E. J. M., Schoutens, A. M. C., Sinoo, M. M. and Aries, M. B. C.	2012	Light therapy: Methodological issues from an engineering perspective	Technology and Health Care	20	1	2023-11-01	1			1
Aira, T., Wang, W., Riedel, M. and Witte, S. S.	2013	Reducing Risk Behaviors Linked to Noncommunicable Diseases in Mongolia: A Randomized Controlled Trial	American Journal of Public Health	103	9	1666-1674	1			1
Belansky, E. S., Cutforth, N., Chavez, R., Crane, L. A., Waters, E. and Marshall, J. A.	2013	Adapted Intervention Mapping: A Strategic Planning Process for Increasing Physical Activity and Healthy Eating Opportunities in Schools via Environment and Policy Change	Journal of School Health	83	3	194-205	1			1
Biswas, I., Mathew, P. J., Singh, R. S. and Puri, G. D.	2013	Evaluation of closed-loop anesthesia delivery for propofol anesthesia in pediatric cardiac surgery	Pediatric Anesthesia	23	12	1145-1152	1			1
Fearon, K. C., Jenkins, J. T., Carli, F. and Lassen, K.	2013	Patient optimization for gastrointestinal cancer surgery	British Journal of Surgery	100	1	15-27	1			1
Gastelurrutia, M. A., Larrañaga, B., Garay, A., Echeveste, F. A. and Fernandez-Llimos, F.	2013	Impact of a program to reduce the dispensing of antibiotics without a prescription in Spain	Pharmacy Practice	11	4	185-190	1			1
Goyder, E. C., Strong, M., Green, A., Holmes, M. W., Miles, G., Reddington, O., Lawson, R., Lee, A. and Basran, G.	2013	Is a large scale community programme as effective as a community rehabilitation programme delivered in the setting of a clinical trial?	Bmc Medical Research Methodology	13			1			1
Green, J., Jester, R., McKinley, R. and Pooler, A.	2013	Nurse-patient consultations in primary care: do patients disclose their concerns?	Journal of Wound Care	22	10	534-539	1			1
Helminen, E. E., Sinikallio, S. H., Valjakka, A. L., Väisänen-Rouvali, R. H. and Arokoski, J. P.	2013	Effectiveness of a cognitive-behavioral group intervention for knee osteoarthritis pain: Protocol of a randomized controlled trial	BMC Musculoskeletal Disorders	14			1			1
Kamble, S., Weinfurt, K. P., Schulman, K. A. and Reed, S. D.	2013	Patient Time Costs Associated with Sensor-Augmented Insulin Pump Therapy for Type 1 Diabetes: Results from the STAR 3 Randomized Trial	Medical Decision Making	33	2	215-224	1			1
Lassen, K., Coolsen, M. M. E., Slim, K., Carli, F., De Aguilar-Nascimento, J. E., Schäfer, M., Parks, R. W., Fearon, K. C. H., Lobo, D. N., Demartines, N., Braga, M., Ljungqvist, O. and Dejong, C. H. C.	2013	Guidelines for perioperative care for pancreaticoduodenectomy: Enhanced recovery after surgery (ERAS®) society recommendations	World Journal of Surgery	37	2	240-258	1			1
Liu, N., Pruszkowski, O., Leroy, J. E., Chazot, T., Trillat, B., Colchen, A., Gonin, F. and Fischler, M.	2013	Automatic administration of propofol and remifentanil guided by the bispectral index during rigid bronchoscopic procedures: a randomized trial	Canadian Journal of Anesthesia-Journal Canadien D Anesthesie	60	9	881-887	1			1
Muyanja, A. W., Atichat, T. and Porter, J. D.	2013	An experimental study on the effect of pattern recognition parameters on the accuracy of wireless-based task time estimation	International Journal of Production Economics	144	2	533-545	1			1
Nagpal, K., Abboudi, M., Manchanda, C., Vats, A., Sevdalis, N., Bicknell, C., Vincent, C. and Moorthy, K.	2013	Improving postoperative handover: a prospective observational study	American Journal of Surgery	206	4	494-501	1			1
Pauly-O'Neill, S., Prion, S. and Nguyen, H.	2013	Comparison of Quality and Safety Education for Nurses (QSEN)-Related Student Experiences During Pediatric Clinical and Simulation Rotations	Journal of Nursing Education	52	9	534-538	1			1
Pearson, G. A. and MacKenzie, I. Z.	2013	Factors that influence the incision-delivery interval at caesarean section and the impact on the neonate: a prospective cohort study	European Journal of Obstetrics & Gynecology and Reproductive Biology	169	2	197-201	1			1
Shaw, R. S.	2013	The relationships among group size, participation, and performance of programming language learning supported with online forums	Computers & Education	62		196-207	1			1
Theilen, U., Leonard, P., Jones, P., Ardill, R., Weitz, J., Agrawal, D. and Simpson, D.	2013	Regular in situ simulation training of paediatric Medical Emergency Team improves hospital response to deteriorating patients	Resuscitation	84	2	218-222	1			1
van der Kooij, S. M., Hehenkamp, W. J. K., Birnie, E., Ankum, W. M., Mol, B. W., Scherjon, S. and Reekers, J. A.	2013	The effect of treatment preference and treatment allocation on patients' health-related quality of life in the randomized EMMY trial	European Journal of Obstetrics & Gynecology and Reproductive Biology	169	1	69-74	1			1
Bledsoe, B. E., Sweeney, R. J., Berkeley, R. P., Cole, K. T., Forred, W. J. and Johnson, L. D.	2014	EMS PROVIDER COMPLIANCE WITH INFECTION CONTROL RECOMMENDATIONS IS SUBOPTIMAL	Prehospital Emergency Care	18	2	290-294	1			1
DiMarco, A. F., Kowalski, K. E., Hromyak, D. R. and Geertman, R. T.	2014	Long-term follow-up of spinal cord stimulation to restore cough in subjects with spinal cord injury	Journal of Spinal Cord Medicine	37	4	380-388	1			1
Dolan, P. and Galizzi, M. M.	2014	Getting policy-makers to listen to field experiments	Oxford Review of Economic Policy	30	4	725-752	1			1
Gastelurrutia, M. A., Larrañaga, B., Garay, A. and Férnandez-Llimos, F.	2014	Assessment of the first 10 years institutional programme on rational use of antibiotics in Gipuzkoa: 1999-2009	Pharmaceutical Care Espana	16	2	49-56	1			1
Hui, S., Ng, J., Santiano, N., Schmidt, H. M., Caldwell, J., Ryan, E. and Maley, M.	2014	Improving hand hygiene compliance: Harnessing the effect of advertised auditing	Healthcare Infection	19	3	108-113	1
Katsaros, K. K., Tsirikas, A. N. and Nicolaidis, C. S.	2014	Managers' workplace attitudes, tolerance of ambiguity and firm performance: The case of Greek banking industry	Management Research Review	37	5	442-465	1			1
Kim, S. E.	2014	Physical Workplace as a Strategic Asset for Improving Performance in Public Organizations	Administration & Society	46	5	496-518			1
Kim, S. E. and Young, W. R.	2014	OFFICE CHARACTERISTICS AND PERCEIVED BEHAVIORAL OUTCOMES IN A PUBLIC AGENCY An Empirical Study	Public Performance & Management Review	38	1	76-99		1
Ledford, C. J. W., Seehusen, D. A., Canzona, M. R. and Cafferty, L. A.	2014	Using a Teaching OSCE to Prompt Learners to Engage With Patients Who Talk About Religion and/or Spirituality	Academic Medicine	89	1	60-65	1			1
Lopetegui, M., Yen, P. Y., Lai, A., Jeffries, J., Embi, P. and Payne, P.	2014	Time motion studies in healthcare: What are we talking about?	Journal of Biomedical Informatics	49		292-299	1			1
Martinez, H., Palar, K., Linnemayr, S., Smith, A., Derose, K. P., Ramírez, B., Farías, H. and Wagner, G.	2014	Tailored Nutrition Education and Food Assistance Improve Adherence to HIV Antiretroviral Therapy: Evidence from Honduras	AIDS and Behavior	18		566-577	1			1
Mbonye, A. K., Magnussen, P., Chandler, C. I. R., Hansen, K. S., Lal, S., Cundill, B., Lynch, C. A. and Clarke, S. E.	2014	Introducing rapid diagnostic tests for malaria into drug shops in Uganda: design and implementation of a cluster randomized trial	Trials	15			1			1
McCambridge, J., Witton, J. and Elbourne, D. R.	2014	Systematic review of the Hawthorne effect: New concepts are needed to study research participation effects	Journal of Clinical Epidemiology	67	3	267-277			1
Molenaar, I. and Chiu, M. M.	2014	Dissecting sequences of regulation and cognition: statistical discourse analysis of primary school children's collaborative learning	Metacognition and Learning	9	2	137-160	1			1
Molenaar, I., Sleegers, P. and van Boxtel, C.	2014	Metacognitive scaffolding during collaborative learning: a promising combination	Metacognition and Learning	9	3	309-332	1			1
O'Donnell, A., Wallace, P. and Kaner, E.	2014	From efficacy to effectiveness and beyond: what next for brief interventions in primary care?	Frontiers in Psychiatry	5			1			1
Olson, R., Elliot, D., Hess, J., Thompson, S., Luther, K., Wipfli, B., Wright, R. and Buckmaster, A. M.	2014	The COMmunity of Practice And Safety Support (COMPASS) total worker health™ study among home care workers: Study protocol for a randomized controlled trial	Trials	15	1		1			1
Ousey, K. J., Milne, J., Cook, L., Stephenson, J. and Gillibrand, W.	2014	A pilot study exploring quality of life experienced by patients undergoing negative-pressure wound therapy as part of their wound care treatment compared to patients receiving standard wound care	International Wound Journal	11	4	357-365	1			1
Padwal, R. S., Rueda-Clausen, C. F., Sharma, A. M., Agborsangaya, C. B., Klarenbach, S., Birch, D. W., Karmali, S., McCargar, L. and Majumdar, S. R.	2014	Weight loss outcomes in wait-listed, medically managed, and surgically treated patients enrolled in a population-based bariatric program prospective cohort study	Medical Care	52	3	208-215	1			1
Schiavon, S. and Altomonte, S.	2014	Influence of factors unrelated to environmental quality on occupant satisfaction in LEED and non-LEED certified buildings	Building and Environment	77		148-159	1			1
Storer, T. W., Dolezal, B. A., Berenc, M. N., Timmins, J. E. and Cooper, C. B.	2014	EFFECT OF SUPERVISED, PERIODIZED EXERCISE TRAINING VS. SELF-DIRECTED TRAINING ON LEAN BODY MASS AND OTHER FITNESS VARIABLES IN HEALTH CLUB MEMBERS	Journal of Strength and Conditioning Research	28	7	1995-2006	1			1
Tsirikas, A. N. and Katsaros, K. K.	2014	Linking knowledge management, job satisfaction and productivity in the Greek public sector	International Journal of Knowledge Management Studies	5	2018-04-03	244-264	1			1
Vartapetiance, A. and Gillam, L.	2014	Deception detection: dependable or defective?	Social Network Analysis and Mining	4	1	2014-01-01	1			1
Villalta-Cerdas, A. and Sandi-Urena, S.	2014	Self-explaining effect in general chemistry instruction: eliciting overt categorical behaviours by design	Chemistry Education Research and Practice	15	4	530-540	1			1
Accetto, R., Salobir, B., Kuhelj, D. and Božič, N.	2015	Treatment of resistant hypertension with renal denervation – yes or no? Our treatment results of the first five patients	Zdravniski Vestnik	84	4	306-312	1			1
Baekgaard, M., Baethge, C., Blom-Hansen, J., Dunlop, C. A., Esteve, M., Jakobsen, M., Kisida, B., Marvel, J., Moseley, A., Serritzlew, S., Stewart, P., Thomsen, M. K. and Wolf, P. J.	2015	Conducting Experiments in Public Management Research: A Practical Guide	International Public Management Journal	18	2	323-342	1
Bever Babendure, J., Reifsnider, E., Mendias, E., Moramarco, M. W. and Davila, Y. R.	2015	Reduced breastfeeding rates among obese mothers: A review of contributing factors, clinical considerations and future directions	International Breastfeeding Journal	10	1		1			1
Graziotin, D., Wang, X. and Abrahamsson, P.	2015	How do you feel, developer? An explanatory theory of the impact of affects on programming performance	PeerJ	2015	1		1			1
Jung, C. S. and Lee, S. Y.	2015	The Hawthorne Studies Revisited: Evidence From the US Federal Workforce	Administration & Society	47	5	507-531		1
Knott, A., Stevenson, M. and Harlow, S. K.	2015	Benchmarking rehabilitation practice in the intensive care unit	Journal of the Intensive Care Society	16	1	24-30	1			1
Ledford, C. J. W., Canzona, M. R., Seehusen, D. A., Cafferty, L. A., Schmidt, M. E., Huang, J. C. and Villagran, M. M.	2015	Differences in Physician Communication When Patients Ask Versus Tell About Religion/Spirituality: A Pilot Study	Family Medicine	47	2	138-142	1			1
Mathe, N., Johnson, S. T., Wozniak, L. A., Majumdar, S. R. and Johnson, J. A.	2015	Alternation as a form of allocation for quality improvement studies in primary healthcare settings: the on-off study design	Trials	16			1			1
Mbonye, A. K., Clarke, S. E., Lal, S., Chandler, C. I., Hutchinson, E., Hansen, K. S. and Magnussen, P.	2015	Introducing rapid diagnostic tests for malaria into registered drug shops in Uganda: lessons learned and policy implications	Malaria Journal	14			1			1
Mogro-Wilson, C., Letendre, J., Toi, H. and Bryan, J.	2015	Utilizing Mutual Aid in Reducing Adolescent Substance Use and Developing Group Engagement	Research on Social Work Practice	25	1	129-138	1			1
Orliaguet, G. A., Lambert, F. B., Chazot, T., Glasman, P., Fischler, M. and Liu, N.	2015	Feasibility of Closed-loop Titration of Propofol and Remifentanil Guided by the Bispectral Monitor in Pediatric and Adolescent Patients A Prospective Randomized Study	Anesthesiology	122	4	759-767	1			1
Pereira, L. P. P., Masson, M. L. V. and Carvalho, F. M.	2015	Vocal warm-up and breathing training for teachers: Randomized clinical trial	Revista de Saude Publica	49			1			1
Snape, L. and Atkinson, C.	2015	Exploring and challenging pupil disaffection: an evaluation of a motivational interviewing-based intervention delivered by paraprofessionals	Pastoral Care in Education	33	2	69-82	1			1
Tjoe, J. A., Greer, D. M., Ihde, S. E., Bares, D. A., Mikkelson, W. M. and Weese, J. L.	2015	Improving Quality Metric Adherence to Minimally Invasive Breast Biopsy among Surgeons Within a Multihospital Health Care System	Journal of the American College of Surgeons	221	3	758-766	1			1
van Witteloostuijn, A.	2015	Toward Experimental International Business Unraveling fundamental causal linkages	Cross Cultural Management-an International Journal	22	4	530-544		1
Westera, W.	2015	Games are motivating, aren't they? Disputing the arguments for digital game-based learning	International Journal of Serious Games	2	2		1			1
Wilkins, L. and Gray, R.	2015	EFFECTS OF STROBOSCOPIC VISUAL TRAINING ON VISUAL ATTENTION, MOTION PERCEPTION, AND CATCHING PERFORMANCE	Perceptual and Motor Skills	121	1	57-79	1			1
Zimmer, S., Korte, P., Verde, P., Ohmann, C., Naumova, E. and Jordan, R. A.	2015	Randomized controlled trial on the efficacy of new alcohol-free chlorhexidine mouthrinses after 8 weeks	International Journal of Dental Hygiene	13	2	110-116	1			1
Bagchi, A. and Bandyopadhyay, S.	2016	Workplace Deviance and Recession	B E Journal of Theoretical Economics	16	1	47-81		1
Baldwin, J., Teh, A., Baniassad, E., van Rooy, D. and Coady, Y.	2016	Requirements for tools for comprehending highly specialized assembly language code and how to elicit these requirements	Requirements Engineering	21	1	131-159	1			1
Burnett, A. E., Bowles, H., Borrego, M. E., Montoya, T. N., Garcia, D. A. and Mahan, C.	2016	Heparin-induced thrombocytopenia: reducing misdiagnosis via collaboration between an inpatient anticoagulation pharmacy service and hospital reference laboratory	Journal of Thrombosis and Thrombolysis	42	4	471-478	1			1
Busse, R., Warner, M. and Zhao, S. M.	2016	In search of the roots of HRM in the Chinese workplace	Chinese Management Studies	10	3	527-543		1
Cadwallader, J. S., Godart, N., Chastang, J., Falissard, B. and Huas, C.	2016	Detecting eating disorder patients in a general practice setting: a systematic review of heterogeneous data on clinical outcomes and care trajectories	Eating and Weight Disorders-Studies on Anorexia Bulimia and Obesity	21	3	365-381	1			1
Choi, J., Chang, Y. K., Lee, K. and Chang, J. D.	2016	Effect of perceived warmth on positive judgment	Journal of Consumer Marketing	33	4	235-244		1
Chokor, A., El Asmar, M., Tilton, C. and Srour, I.	2016	Dual Assessment Framework to Evaluate LEED-Certified Facilities' Occupant Satisfaction and Energy Performance: Macro and Micro Approaches	Journal of Architectural Engineering	22	4		1			1
Frederiks, E. R., Stenner, K., Hobman, E. V. and Fischle, M.	2016	Evaluating energy behavior change programs using randomized controlled trials: Best practice guidelines for policymakers	Energy Research & Social Science	22		147-164	1			1
Herz, D., DaJusta, D., Ching, C. and McLeod, D.	2016	Segmental arterial mapping during pediatric robot-assisted laparoscopic heminephrectomy: A descriptive series	Journal of Pediatric Urology	12	4		1			1
Johnston, L. E., Robinson, W. P., Tracci, M. C., Kern, J. A., Cherry, K. J., Kron, I. L. and Upchurch, G. R.	2016	Vascular Quality Initiative and National Surgical Quality Improvement Program registries capture different populations and outcomes in open infrainguinal bypass	Journal of Vascular Surgery	64	3	629-636	1			1
Lantz, B. and Rosén, P.	2016	Measuring effective capacity in an emergency department	Journal of Health, Organisation and Management	30	1	73-84	1			1
Maaskant, A. M., van Rooij, F. B., Overbeek, G. J., Oort, F. J. and Hermanns, J. M. A.	2016	Parent training in foster families with children with behavior problems: Follow-up results from a randomized controlled trial	Children and Youth Services Review	70		84-94	1			1
Mancuso, M. P., Dziadkowiec, O., Kleiner, C., Halverson-Carpenter, K., Link, T. and Barry, J.	2016	Crew Resource Management for Obstetric and Neonatal Teams to Improve Communication During Cesarean Births	Jognn-Journal of Obstetric Gynecologic and Neonatal Nursing	45	4	502-514	1			1
Puri, G. D., Mathew, P. J., Biswas, I., Dutta, A., Sood, J., Gombar, S., Palta, S., Tsering, M., Gautam, P. L., Jayant, A., Arora, I., Bajaj, V., Punia, T. S. and Singh, G.	2016	A Multicenter Evaluation of a Closed-Loop Anesthesia Delivery System: A Randomized Controlled Trial	Anesthesia and Analgesia	122	1	106-114	1			1
van Veghel, D., Marteijn, M., de Mol, B. and Measurably Better Study, Grp	2016	First results of a national initiative to enable quality improvement of cardiovascular care by transparently reporting on patient-relevant outcomes(aEuro)	European Journal of Cardio-Thoracic Surgery	49	6	1660-1669	1			1
Villalta-Cerdas, A. and Sandi-Urena, S.	2016	Assessment of self-explaining effect in a large enrolment General Chemistry course	Educacion Quimica	27	2	115-125	1			1
Weem, Smop, Teraa, M., den Ruijter, H. M., de Borst, G. J., Verhaar, M. C. and Moll, F. L.	2016	Quality of Life After Treatment with Autologous Bone Marrow Derived Cells in No Option Severe Limb Ischemia	European Journal of Vascular and Endovascular Surgery	51	1	83-89	1			1
Amacher, S. A., Schumacher, C., Legeret, C., Tschan, F., Semmer, N. K., Marsch, S. and Hunziker, S.	2017	Influence of Gender on the Performance of Cardiopulmonary Rescue Teams: A Randomized, Prospective Simulator Study	Critical Care Medicine	45	7	1184-1191	1			1
Barnum, D., Coupet, J., Gleason, J., McWilliams, A. and Parhankangas, A.	2017	Impact of input substitution and output transformation on data envelopment analysis decisions	Applied Economics	49	15	1543-1556		1
Busch, L.	2017	Looking in the Wrong (La)place? The Promise and Perils of Becoming Big Data	Science Technology & Human Values	42	4	657-678			1
Clanton, J., Gardner, A., Subichin, M., McAlvanah, P., Hardy, W., Shah, A. and Porter, J.	2017	Patient Hand-Off iNitiation and Evaluation (PHONE) study: A randomized trial of patient handoff methods	American Journal of Surgery	213	2	299-306	1			1
Fujitani, M., McFall, A., Randler, C. and Arlinghaus, R.	2017	Participatory adaptive management leads to environmental learning outcomes extending beyond the sphere of science	Science Advances	3	6		1			1
Hiemisch, A., & Kiess,	2017	The Dilemma Associated with Incidental Findings	Pediatr Adolesc Med.	21		41-59	1			1
Lantz, B. and Rosén, P.	2017	Using queueing models to estimate system capacity	Production Planning and Control	28	13	1037-1046	1			1
Mahajan, V., Samra, T. and Puri, G. D.	2017	Anaesthetic depth control using closed loop anaesthesia delivery system vs. target controlled infusion in patients with moderate to severe left ventricular systolic dysfunction	Journal of Clinical Anesthesia	42		106-113	1			1
Molenaar, I. and Chiu, M. M.	2017	Effects of Sequences of Cognitions on Group Performance Over Time	Small Group Research	48	2	131-164	1			1
Paradis, E. and Sutkin, G.	2017	Beyond a good story: from Hawthorne Effect to reactivity in health professions education research	Medical Education	51	1	31-39			1
Zaragoza, J. M. and Fraser, B. J.	2017	Field-study science classrooms as positive and enjoyable learning environments	Learning Environments Research	20	1		1			1
Behfar, K. and Okhuysen, G. A.	2018	Discovery Within Validation Logic: Deliberately Surfacing, Complementing, and Substituting Abductive Reasoning in Hypothetico-Deductive Inquiry	Organization Science	29	2	323-340		1
Bui, A. H., Guerrier, S., Feldman, D. L., Kischak, P., Mudiraj, S., Somerville, D., Shebeen, M., Girdusky, C. and Leitman, I. M.	2018	Is video observation as effective as live observation in improving teamwork in the operating room?	Surgery	163	6	1191-1196	1			1
Hunter, S. A., Martin, R., Weatherall, M. and Galletly, D.	2018	Anesthetists and Surgeons Predict Postoperative Pain	Journal of Perianesthesia Nursing	33	2	200-208	1			1
Hureibi, K., Evans, C., Wong, L. and Ain, Q.	2018	Time to rethink surgeon-specific outcome data for colorectal surgeons in England: Cross-sectional data of 73,842 resections for colorectal cancer	International Journal of Surgery	57		101-104	1			1
Kelman, G., Manes, E., Lamieri, M. and Brée, D. S.	2018	MISSING DATA AS PART of the SOCIAL BEHAVIOR in REAL-WORLD FINANCIAL COMPLEX SYSTEMS	Advances in Complex Systems	21	1		1			1
Li, S. Q., Fan, M. and Wu, X. Y.	2018	Effect of Social Capital between Construction Supervisors and Workers on Workers' Safety Behavior	Journal of Construction Engineering and Management	144	4			1
Mitsuhashi, T.	2018	Effects of two-week e-learning on eHealth literacy: a randomized controlled trial of Japanese Internet users	Peerj	6			1			1
Tsai, L. C. F., Nolasco, C. A. R. I. and Vaughn, M. S.	2018	Modeling job stress among police officers: interplay of work environment, counseling support, and family discussion with co-workers	Police Practice and Research	19	3	253-269		1
Wang, J. J., Simmons, S. F., Maxwell, C. A., Schlundt, D. G. and Mion, L. C.	2018	Home Health Nurses' Perspectives and Care Processes Related to Older Persons with Frailty and Depression: A Mixed Method Pilot Study	Journal of Community Health Nursing	35	3	118-136	1			1
Zhu, C. and Urhahne, D.	2018	The use of learner response systems in the classroom enhances teachers’ judgment accuracy	Learning and Instruction	58		255-262	1			1
							197	63	17	189

## Sheet: Jones 1992
Jones 1992							Aff	Neut	Neg	Citing as aff
Calavas, D., Ducrot, C., Sabatier, P. and Paye, B.	1996	Interaction between the observer and the observed in ecopathology	Natures Sciences Societes	4	4	341-350		1
Koehler, J. J.	1996	The base rate fallacy reconsidered: Descriptive, normative, and methodological challenges	Behavioral and Brain Sciences	19	1	1-+			1
Maines, D. R.; Bridger, J. C.; Ulmer, J. T.	1996	Mythic facts and Park's pragmatism: On predecessor-selection and theorizing in human ecology	Sociological Quarterly	37	3	521-549			1
Brannigan, A.	1997	The postmodern experiment: science and ontology in experimental social psychology	British Journal of Sociology	48	4	594-610		1
DiGiacomo, J. C.; Hoff, W. S.; Rotondo, M. F.; Martin, K.; Kauder, D. R.; Anderson, H. L.; Phillips, G. R.; Schwab, C. W.	1997	Barrier precautions in trauma resuscitation: Real-time analysis utilizing videotape review	American Journal of Emergency Medicine	15	1	34-39	1			1
Willer, D.; Lovaglia, M. J.; Markovsky, B.	1997	Power and influence: A theoretical bridge	Social Forces	76	2	571-603		1
Day, M. T.	1998	Transformational discourse: Ideologies of organizational change in the academic library and information science literature	Library Trends	46	4	635-667		1
Ducrot, C.; Calavas, D.; Sabatier, P.; Faye, B.	1998	Qualitative interaction between the observer and the observed in veterinary epidemiology	Preventive Veterinary Medicine	34	2018-03-02	107-113	1
Moldaschl, M.; Weber, W. G.	1998	The "three waves" of industrial group work: Historical reflections on current research on group work	Human Relations	51	3	347-388		1
Sohlberg, M. M.; Glang, A.; Todis, B.	1998	Improvement during baseline: three case studies encouraging collaborative research when evaluating caregiver training	Brain Injury	12	4	333-346		1
Walsh, J. P.; Tseng, S. F.	1998	The effects of job characteristics on active effort at work	Work and Occupations	25	1	74-96			1
Bornstein, R. F.	1999	Objectivity and subjectivity in psychological science: Embracing and transcending psychology's positivist tradition	Journal of Mind and Behavior	20	1	2016-01-01			1
Krueger, A. B.	1999	Experimental estimates of education production functions	Quarterly Journal of Economics	114	2	497-532	1
Wickstrom, G.; Bendix, T.	2000	The "Hawthorne effect" - what did the original Hawthorne studies actually show?	Scandinavian Journal of Work Environment & Health	26	4	363-367			1
Booth, K. M.; James, B. W.	2001	Interactive learning in a higher education Level 1 mechanics module	International Journal of Science Education	23	9	955-967	1
Brannigan, A.; Zwernman, W.	2001	The real "Hawthorne effect"	Society	38	2	55-60			1
Burton, G.	2001	The Tenacity of Historical Misinformation. Titchener Did Not Invent the Titchener Illusion	History of Psychology	4	3	228-244			1
Chisholm, C. D.; Dornfeld, A. M.; Nelson, D. R.; Cordell, W. H.	2001	Work interrupted: A comparison of workplace interruptions in emergency departments and primary care offices	Annals of Emergency Medicine	38	2	146-151	1			1
Earl, M. L.; Jackson, M. M.; Rickman, L. S.	2001	Improved rates of compliance with hand antisepsis guidelines: A three-phase observational study	American Journal of Nursing	101	3	26-33	1
Fostervold, K. I.; Buckmann, E.; Lie, I.	2001	VDU-screen filters: remedy or the ubiquitous Hawthorne effect?	International Journal of Industrial Ergonomics	27	2	107-118	1
McColl, S. L.; Veitch, J. A.	2001	Full-spectrum fluorescent lighting: a review of its effects on physiology and health	Psychological Medicine	31	6	949-964	1
Streiner, D. L.	2001	Regression toward the mean: Its etiology, diagnosis, and treatment	Canadian Journal of Psychiatry-Revue Canadienne De Psychiatrie	46	1	72-76	1
Harbarth, S.; Pittet, D.; Grady, L.; Zawacki, A.; Potter-Bynoe, G.; Samore, M. H.; Goldmann, D. A.	2002	Interventional study to evaluate the impact of an alcohol-based hand gel in improving hand hygiene compliance	Pediatric Infectious Disease Journal	21	6	489-495	1			1
Hsueh, Y.	2002	The Hawthorne Experiments and the Introduction of Jean Piaget in American Industrial Psychology, 1929-1932	History of Psychology	5	2	163-189			1
Cobb-Clark, D. A.; Crossley, T.	2003	Econometrics for evaluations: An introduction to recent developments	Economic Record	79	247	491-511	1
Scherer, L. A.; Chang, M. C.; Meredith, J. W.; Battistella, F. D.	2003	Videotape review leads to rapid and sustained learning	American Journal of Surgery	185	6	516-520	1			1
Shearer, B.	2003	COMPENSATION POLICY AND WORKER PERFORMANCE: IDENTIFYING INCENTIVE EFFECTS FROM FIELD EXPERIMENTS	Journal of the European Economic Association	1	2018-03-02	503-511	1
Cochran, J. A.; Ketley, C. E.; Duckworth, R. M.; van Loveren, C.; Holbrook, W. P.; Seppa, L.; Sanches, L.; Polychronopoulou, A.; O'Mullane, D. M.	2004	Development of a standardized method for comparing fluoride ingested from toothpaste by 1.5-3.5-year-old children in seven European countries. Part 1: Field work	Community Dentistry and Oral Epidemiology	32		39-46	1			1
Grigg, M.; Endacott, R.; Herrman, H.; Harvey, C.	2004	An ethnographic study of three mental health triage programs	International Journal of Mental Health Nursing	13	3	146-151	1
Bardsley, N.	2005	Experimental economics and the artificiality of alteration	Journal of Economic Methodology	12	2	239-251		1
Hansson, M. and Wigblad, R.	2006	Recontextualizing the Hawthorne effect	Scandinavian Journal of Management	22	2	120-137	1
Kompier, Michiel AJ	2006	The “Hawthorne effect” is a myth, but what keeps the story going?	Scandinavian Journal of Work, Environment & Health	32	5	402-412			1
Leonard, K. and Masatu, M. C.	2006	Outpatient process quality evaluation and the Hawthorne Effect	Social Science and Medicine	63	9	2330-2340	1
Rogers, L. Q. and Tudor-Locke, C.	2006	Physical activity reactivity: More questions than answers [2]	Measurement in Physical Education and Exercise Science	10	4	269-271	1			1
Ellingsen, T.; Johannesson, M.	2007	Paying respect	Journal of Economic Perspectives	21	4	135-149		1
Johnson, E. G., Larsen, A., Ozawa, H., Wilson, C. A. and Kennedy, K. L.	2007	The effects of Pilates-based exercise on dynamic balance in healthy adults	Journal of Bodywork and Movement Therapies	11	3	238-242	1			1
McCarney, R.; Warner, J.; Iliffe, S.; van Haselen, R.; Griffin, M.; Fisher, P.	2007	The Hawthorne Effect: a randomised, controlled trial	Bmc Medical Research Methodology	7		8	1
Paarsch, H. J.; Shearer, B. S.	2007	Do women react differently to incentives? Evidence from experimental data and payroll records	European Economic Review	51	7	1682-1707	1
Rosenbaum, P. R.	2007	Interference between units in randomized experiments	Journal of the American Statistical Association	102	477	191-200	1			1
Bardsley, N.	2008	Dictator game giving: altruism or artefact?	Experimental Economics	11	2	122-133	1			1
Desai, C. M.; Graves, S. J.	2008	Cyberface or face-to-face - The teachable moment and changing reference mediums	Reference & User Services Quarterly	47	3	242-+		1
Fostervold, K. I.; Nersveen, J.	2008	Proportions of direct and indirect indoor lighting - The effect on health, well-being and cognitive performance of office workers	Lighting Research & Technology	40	3	175-200	1
Grant, A. M.	2008	The significance of task significance: Job performance effects, relational mechanisms, and boundary conditions	Journal of Applied Psychology	93	1	108-124	1			1
Leonard, K. L.	2008	Is patient satisfaction sensitive to changes in the quality of care? An exploitation of the Hawthorne effect	Journal of Health Economics	27	2	444-459	1
Malani, A.	2008	REGULATION WITH PLACEBO EFFECTS	Duke Law Journal	58	3	411-472	1			1
McCambridge, J.; Day, M.	2008	Randomized controlled trial of the effects of completing the Alcohol Use Disorders Identification Test questionnaire on self-reported hazardous drinking	Addiction	103	2	241-248	1
Rosenberg, A. D.; Wambold, D.; Kraemer, L.; Begley-Keyes, M.; Zuckerman, S. L.; Singh, N.; Cohen, M. M.; Bennett, M. V.	2008	Ensuring apinrolmriate timina of antimicrobial prophylaxis	Journal of Bone and Joint Surgery-American Volume	90A	2	226-+	1			1
Singh, S.; Midha, S.; Singh, N.; Joshi, Y. K.; Garg, P. K.	2008	Dietary counseling versus dietary supplements for malnutrition in chronic pancreatitis: A randomized controlled trial	Clinical Gastroenterology and Hepatology	6	3	353-359	1
Bhardwaj, P.; Garg, P. K.; Maulik, S. K.; Saraya, A.; Tandon, R. K.; Acharya, S. K.	2009	A Randomized Controlled Trial of Antioxidant Supplementation for Pain Relief in Patients With Chronic Pancreatitis	Gastroenterology	136	1	149-159	1			1
Brown, S.; Belgaumi, A.; Kofide, A.; Littlechild, B.; Sabbah, R.; Ezzat, A.; Shoukri, M.; Barr, R.; Levin, A.	2009	Failure to attend appointments and loss to follow-up: a prospective study of patients with malignant lymphoma in Riyadh, Saudi Arabia	European Journal of Cancer Care	18	3	313-317	1			1
Falk, A.; Heckman, J. J.	2009	Lab Experiments Are a Major Source of Knowledge in the Social Sciences	Science	326	5952	535-538			1
Luck, H. E.	2009	The Hawthorne effect - an effect for many occasions?	Gruppendynamik Und Organisationsberatung	40	1	102-114			1
Pennington, L.; Thomson, K.; James, P.; Martin, L.; McNally, R.	2009	Effects of It Takes Two to Talk-The Hanen Program for Parents of Preschool Children With Cerebral Palsy: Findings From an Exploratory Study	Journal of Speech Language and Hearing Research	52	5	1121-1138	1			1
Barnes, B. R.	2010	The Hawthorne Effect in community trials in developing countries	International Journal of Social Research Methodology	13	4	357-370	1
Emerson, G. B.; Warme, W. J.; Wolf, F. M.; Heckman, J. D.; Brand, R. A.; Leopold, S. S.	2010	Testing for the Presence of Positive-Outcome Bias in Peer Review A Randomized Controlled Trial	Archives of Internal Medicine	170	21	1934-1939	1			1
Inamori, T. and Analoui, F.	2010	Beyond Pygmalion effect: the role of managerial perception	Journal of Management Development	29	4	306-321	1
Leonard, K. L. and Masatu, M. C.	2010	Using the Hawthorne effect to examine the gap between a doctor's best possible practice and actual performance	Journal of Development Economics	93	2	226-234	1
Zizzo, D. J.	2010	Experimenter demand effects in economic experiments	Experimental Economics	13	1	75-98	1
Abramowicz, M.; Ayres, I.; Listokin, Y.	2011	RANDOMIZING LAW	University of Pennsylvania Law Review	159	4	929-1005	1
Baiden, F.; Owusu-Agyei, S.; Bawah, J.; Bruce, J.; Tivura, M.; Delmini, R.; Gyaase, S.; Amenga-Etego, S.; Chandramohan, D.; Webster, J.	2011	An Evaluation of the Clinical Assessments of Under-Five Febrile Children Presenting to Primary Health Facilities in Rural Ghana	Plos One	6	12	8	1			1
Ballermann, M. A.; Shaw, N. T.; Mayes, D. C.; Gibney, R. T. N.; Westbrook, J. I.	2011	Validation of the Work Observation Method By Activity Timing (WOMBAT) method of conducting time-motion observations in critical care settings: an observational study	Bmc Medical Informatics and Decision Making	11		12			1
Inamori, T., Analoui, F. and Kakabadse, N.	2011	Can perceptual differences account for managerial success?: The case of Japanese aid workers	Management Research Review	35	1	32-51	1
Izawa, M. R., French, M. D. and Hedge, A.	2011	Shining new light on the hawthorne illumination experiments	Human Factors	53	5	528-547			1
Lee, R. M.	2011	THE MOST IMPORTANT TECHNIQUE ... : CARL ROGERS, HAWTHORNE, AND THE RISE AND FALL OF NONDIRECTIVE INTERVIEWING IN SOCIOLOGY	Journal of the History of the Behavioral Sciences	47	2	123-146		1
Levitt, Steven D.; List, John A.	2011	Was There Really a Hawthorne Effect at the Hawthorne Plant? An Analysis of the Original Illumination Experiments	American Economic Journal: Applied Economics, American Economic Association	3	1	224-238			1
Niederseer, D., Ledl-Kurkowski, E., Kvita, K., Patsch, W., Dela, F., Mueller, E. and Niebauer, J.	2011	Salzburg Skiing for the Elderly Study: Changes in cardiovascular risk factors through skiing in the elderly	Scandinavian Journal of Medicine and Science in Sports	21	SUPPL. 1	47-55	1			1
Schrimsher, G. W. and Filtz, K.	2011	Assessment reactivity: Can assessment of alcohol use during research be an active treatment?	Alcoholism Treatment Quarterly	29	2	108-115		1
Tai-Seale, M.; Bolin, J.; Bao, X. M.; Street, R.	2011	Management of chronic pain among older patients: Inside primary care in the US	European Journal of Pain	15	10	8	1			1
Bernstein, E. S.	2012	The Transparency Paradox: A Role for Privacy in Organizational Learning and Operational Control	Administrative Science Quarterly	57	2	181-216	1
Byrd, H.	2012	Post-occupancy evaluation of green buildings: the measured impact of over-glazing	Architectural Science Review	55	3	206-212	1			1
Cox, J. C.; Sadiraj, V.	2012	DIRECT TESTS OF INDIVIDUAL PREFERENCES FOR EFFICIENCY AND EQUITY	Economic Inquiry	50	4	920-931	1
Doreian, P.; Conti, N.	2012	Social context, spatial structure and social network structure	Social Networks	34	1	32-46		1
Eriksson, A., Axelsson, S. B. and Axelsson, R.	2012	Collaboration in workplace health promotion - A case study	International Journal of Workplace Health Management	5	3	181-193	1			1
Flett, M. R.; Gould, D.; Lauer, L.	2012	A Study of an Underserved Youth Sports Program Using the Youth Program Quality Assessment	Journal of Applied Sport Psychology	24	3	275-289	1			1
Guimaraes, L. B. D.; Ribeiro, J. L. D.; Renner, J. S.	2012	Cost-benefit analysis of a socio-technical intervention in a Brazilian footwear company	Applied Ergonomics	43	5	948-957			1
Herbert, H. A.; Morton, R. P.	2012	Sialocele after Parotid Surgery: Assessing the Risk Factors	Otolaryngology-Head and Neck Surgery	147	3	489-492	1
Kaewchana, S.; Simmerman, M.; Somrongthong, R.; Suntarattiwong, P.; Lertmaharit, S.; Chotipitayasunondh, T.	2012	Effect of Intensive Hand Washing Education on Hand Washing Behaviors in Thai Households with an Influenza-Positive Child in Urban Thailand	Asia-Pacific Journal of Public Health	24	4	577-585	1			1
Kee, R.; Knott, J. C.; Dreyfus, S.; Lederman, R.; Milton, S.; Joe, K.	2012	One hundred tasks an hour: An observational study of emergency department consultant activities	Emergency Medicine Australasia	24	3	294-302	1			1
Peoples, C. D.; Sigillo, A. E.; Green, M.; Miller, M. K.	2012	FRIENDSHIP AND CONFORMITY IN GROUP OPINIONS: JUROR VERDICT CHANGE IN MOCK JURIES	Sociological Spectrum	32	2	178-193		1
Shires, D. A.; Stange, K. C.; Divine, G.; Ratliff, S.; Vashi, R.; Tai-Seale, M.; Lafata, J. E.	2012	Prioritization of Evidence-Based Preventive Health Services During Periodic Health Examinations	American Journal of Preventive Medicine	42	2	164-173	1
Ukawa, S.; Satoh, H.; Yuasa, M.; Ikeno, T.; Kawabata, T.; Araki, A.; Yoshioka, E.; Murata, W.; Ikoma, K.; Kishi, R.	2012	A randomized controlled trial of a Functioning Improvement Tool home-visit program and its effect on cognitive function in older persons	International Journal of Geriatric Psychiatry	27	6	557-564	1			1
Vazirani, J.; Knott, J. C.	2012	Mandatory Pain Scoring at Triage Reduces Time to Analgesia	Annals of Emergency Medicine	59	2	134-138	1			1
Desplenter, F., Laekeman, G. and Simoens, S.	2013	Differentiated information on antidepressants at hospital discharge: A hypothesis-generating study	International Journal of Pharmacy Practice	21	4	252-262	1			1
Faruqui, A.; Sergici, S.; Akaba, L.	2013	Dynamic pricing of electricity for residential customers: the evidence from Michigan	Energy Efficiency	6	3	571-584	1			1
Haig, B. D.	2013	Detecting Psychological Phenomena: Taking Bottom-Up Research Seriously	American Journal of Psychology	126	2	135-153			1
Jensen, B.; Holm, A.; Bremberg, S.	2013	Effectiveness of a Danish early year preschool program: A randomized trial	International Journal of Educational Research	62		115-128	1
McDonald, B.	2013	A Step-by-Step Teaching Technique for Teachers With Adult Students of Mathematics	Adult Education Quarterly	63	4	357-372	1			1
Schwartz, D.; Fischhoff, B.; Krishnamurti, T.; Sowell, F.	2013	The Hawthorne effect and energy awareness	Proceedings of the National Academy of Sciences of the United States of America	110	38	15242-15246	1
Shah, B. R.; Thomas, K. L.; Elliot-Bynum, S.; Thomas, K.; Damon, K.; LaPointe, N. A.; Calhoun, S. A.; Thomas, L.; Mathews, R.; Califf, R. M.; Peterson, E. D.	2013	Check It, Change It A Community-Based Intervention to Improve Blood Pressure Control	Circulation-Cardiovascular Quality and Outcomes	6	6	741-748	1			1
Singleton, L. G.	2013	Exploring early academic responses to Functions of the Executive	Journal of Management History	19	4	492-511	1
Tulowitzki, P.	2013	Leadership and school improvement in France	Journal of Educational Administration	51	6	812-835	1
Wilson, G.; Sparks, S. A.; Drust, B.; Morton, J. P.; Close, G. L.	2013	Assessment of energy expenditure in elite jockeys during simulated race riding and a working day: implications for making weight	Applied Physiology Nutrition and Metabolism-Physiologie Appliquee Nutrition Et Metabolisme	38	4	415-420	1			1
Dolan, P.; Galizzi, M. M.	2014	Getting policy-makers to listen to field experiments	Oxford Review of Economic Policy	30	4	725-752	1			1
Guimaraes, L. B. D.; Ribeiro, J. L. D.; Renner, J. S.; de Oliveira, P. A. B.	2014	Worker evaluation of a macroergonomic intervention in a Brazilian footwear company	Applied Ergonomics	45	4	923-935	1
Haessler, S.	2014	The Hawthorne effect in measurements of hand hygiene compliance: a definite problem, but also an opportunity	Bmj Quality & Safety	23	12	965-967	1
Honig, B.; Lampel, J.; Siegel, D.; Drnevich, P.	2014	Ethics in the Production and Dissemination of Management Research: Institutional Failure or Individual Fallibility?	Journal of Management Studies	51	1	118-142			1
Hui, S., Ng, J., Santiano, N., Schmidt, H. M., Caldwell, J., Ryan, E. and Maley, M.	2014	Improving hand hygiene compliance: Harnessing the effect of advertised auditing	Healthcare Infection	19	3	108-113	1
Johal, A.; Fleming, P. S.; Al Jawad, F. A.	2014	A prospective longitudinal controlled assessment of pain experience and oral health-related quality of life in adolescents undergoing fixed appliance treatment	Orthodontics & Craniofacial Research	17	3	178-186		1
Kluver, J.; Frazier, R.; Haidt, J.	2014	Behavioral ethics for Homo economicus, Homo heuristicus, and Homo duplex	Organizational Behavior and Human Decision Processes	123	2	150-158	1
Leslie, M.; Paradis, E.; Gropper, M. A.; Reeves, S.; Kitto, S.	2014	Applying ethnography to the study of context in healthcare quality and safety	Bmj Quality & Safety	23	2	99-105	1			1
McCambridge, J.; Kypri, K.; Elbourne, D.	2014	In randomization we trust? There are overlooked problems in experimenting with people in behavioral intervention trials	Journal of Clinical Epidemiology	67	3	247-253		1
McCambridge, J.; Witton, J.; Elbourne, D. R.	2014	Systematic review of the Hawthorne effect: New concepts are needed to study research participation effects	Journal of Clinical Epidemiology	67	3	267-277		1
Michels, C.; Schmoch, U.	2014	Impact of bibliometric studies on the publication behaviour of authors	Scientometrics	98	1	369-385	1			1
Shivalli, S. and Sanklapur, V.	2014	Healthcare waste management: Qualitative and quantitative appraisal of nurses in a tertiary care hospital of India	Scientific World Journal	2014			1			1
Straub, J., Whalen, D. and Marsh, R.	2014	Assessing the value of the OpenOrbiter program’s research experience for undergraduates	SAGE Open	4	3	2018-08-01		1
Taneja, H.; Viswanathan, V.	2014	Still Glued to the Box? Television Viewing Explained in a Multi-Platform Age Integrating Individual and Situational Predictors	International Journal of Communication	8		2134-2159	1
Taylor, F.; Marsden, E. J.	2014	Perceptions, Attitudes, and Choosing to Study Foreign Languages in England: An Experimental Intervention	Modern Language Journal	98	4	902-920	1			1
Vartapetiance, A. and Gillam, L.	2014	Deception detection: dependable or defective?	Social Network Analysis and Mining	4	1	2014-01-01	1			1
Villalta-Cerdas, A.; Sandi-Urena, S.	2014	Self-explaining effect in general chemistry instruction: eliciting overt categorical behaviours by design	Chemistry Education Research and Practice	15	4	530-540	1			1
Amble, I.; Gude, T.; Stubdal, S.; Andersen, B. J.; Wampold, B. E.	2015	The effect of implementing the Outcome Questionnaire-45.2 feedback system in Norway: A multisite randomized clinical trial in a naturalistic setting	Psychotherapy Research	25	6	669-677	1			1
Bakker, S.; van den Hoven, E.; Eggen, B.	2015	Evaluating Peripheral Interaction Design	Human-Computer Interaction	30	6	473-506	1			1
Chen, L. F.; Vander, M. W.; Hofmann, D. A.; Reisinger, H. S.	2015	The Hawthorne Effect in Infection Prevention and Epidemiology	Infection Control and Hospital Epidemiology	36	12	1444-1450	1			1
Curry, L. A.; Linnander, E. L.; Brewster, A. L.; Ting, H.; Krumholz, H. M.; Bradley, E. H.	2015	Organizational culture change in US hospitals: a mixed methods longitudinal intervention study	Implementation Science	10		11	1			1
Haanes, G. G.; Kirkevold, M.; Hofoss, D.; Horgen, G.; Eilertsen, G.	2015	An intervention designed to improve sensory impairments in the elderly and indoor lighting in their homes: an exploratory randomized controlled trial	Journal of Multidisciplinary Healthcare	8		2020-11-01	1			1
Hall, D. E.; Hanusa, B. H.; Fine, M. J.; Arnold, R. M.	2015	Do surgeons and patients discuss what they document on consent forms?	Journal of Surgical Research	197	1	67-77	1
Knapper, A.; Christoph, M.; Hagenzieker, M.; Brookhuis, K.	2015	Comparing a driving simulator to the real road regarding distracted driving speed	European Journal of Transport and Infrastructure Research	15	2	205-225	1			1
Shivalli, S.; Srivastava, R. K.; Singh, G. P.	2015	Trials of Improved Practices (TIPs) to Enhance the Dietary and Iron-Folate Intake during Pregnancy-A Quasi Experimental Study among Rural Pregnant Women of Varanasi, India	Plos One	10	9	15	1			1
Walter, S. R.; Dunsmuir, W. T. M.; Westbrook, J. I.	2015	Studying interruptions and multitasking in situ: The untapped potential of quantitative observational studies	International Journal of Human-Computer Studies	79		118-125	1
Brenner, P. S.; DeLamater, J.	2016	Measurement Directiveness as a Cause of Response Bias: Evidence From Two Survey Experiments	Sociological Methods & Research	45	2	348-371	1
Hrin, T. N.; Fahmy, A. F. M.; Segedinac, M. D.; Milenkovic, D. D.	2016	Systemic Synthesis Questions SSynQs as Tools to Help Students to Build Their Cognitive Structures in a Systemic Manner	Research in Science Education	46	4	525-546	1			1
Hrin, T. N.; Milenkovic, D. D.; Segedinac, M. D.	2016	The Effect of Systemic Synthesis Questions SSynQs on Students' Performance and Meaningful Learning in Secondary Organic Chemistry Teaching	International Journal of Science and Mathematics Education	14	5	805-824	1			1
Hrin, T. N.; Milenkovic, D. D.; Segedinac, M. D.; Horvat, S.	2016	Enhancement and assessment of students' systems thinking skills by application of systemic synthesis questions in the organic chemistry course	Journal of the Serbian Chemical Society	81	12	1455-1471	1			1
Pabel, A.; Pearce, P. L.	2016	Tourists' responses to humour	Annals of Tourism Research	57		190-205	1			1
Rao, S. B. S.; Simpson, T. L.	2016	Influence of Vision on Ocular Comfort Ratings	Optometry and Vision Science	93	8	793-800	1
Talukdar, R.; Lakhtakia, S.; Reddy, D. N.; Rao, G. V.; Pradeep, R.; Banerjee, R.; Gupta, R.; Ramchandani, M.; Tandan, M.; Murthy, H. V.	2016	Ameliorating effect of antioxidants and pregabalin combination in pain recurrence after ductal clearance in chronic pancreatitis: Results of a randomized, double blind, placebo-controlled trial	Journal of Gastroenterology and Hepatology	31	9	1654-1662	1			1
Villalta-Cerdas, A. and Sandi-Urena, S.	2016	Assessment of self-explaining effect in a large enrolment General Chemistry course	Educacion Quimica	27	2	115-125	1			1
Weger, U. W.; Berger, B.; Boehm, K.; Heusser, P.	2016	The Psychological Dimensions of Placebo-Studies Recommendations for Study Designs	European Psychologist	21	2	122-130	1
Amacher, S. A., Schumacher, C., Legeret, C., Tschan, F., Semmer, N. K., Marsch, S. and Hunziker, S.	2017	Influence of Gender on the Performance of Cardiopulmonary Rescue Teams: A Randomized, Prospective Simulator Study	Critical Care Medicine	45	7	1184-1191	1			1
Bager, S. and Mundaca, L.	2017	Making ‘Smart Meters’ smarter? Insights from a behavioural economics pilot field experiment in Copenhagen, Denmark	Energy Research and Social Science	28		68-76	1			1
Bernstein, E. S.	2017	MAKING TRANSPARENCY TRANSPARENT: THE EVOLUTION OF OBSERVATION IN MANAGEMENT THEORY	Academy of Management Annals	11	1	217-266		1
Byington, E. K.; Felps, W.	2017	Solutions to the Credibility Crisis in Management Science	Academy of Management Learning & Education	16	1	142-162		1
Goodwin, M. A.; Stange, K. C.; Zyzanski, S. J.; Crabtree, B. F.; Borawski, E. A.; Flocke, S. A.	2017	The Hawthorne effect in direct observation research with physicians and patients	Journal of Evaluation in Clinical Practice	23	6	1322-1328	1
Paradis, E.; Sutkin, G.	2017	Beyond a good story: from Hawthorne Effect to reactivity in health professions education research	Medical Education	51	1	31-39			1
Ridderikhof, M. L.; Schyns, F. J.; Schep, N. W.; Lirk, P.; Hollmann, M. W.; Goslings, J. C.	2017	EMERGENCY DEPARTMENT PAIN MANAGEMENT IN ADULT PATIENTS WITH TRAUMATIC INJURIES BEFORE AND AFTER IMPLEMENTATION OF A NURSE-INITIATED PAIN TREATMENT PROTOCOL UTILIZING FENTANYL FOR SEVERE PAIN	Journal of Emergency Medicine	52	4	417-425	1			1
Ronzi, Y.; Roche-Leboucher, G.; Begue, C.; Dubus, V.; Bontoux, L.; Roquelaure, Y.; Richard, I.; Petit, A.	2017	Efficiency of three treatment strategies on occupational and quality of life impairments for chronic low back pain patients: is the multidisciplinary approach the key feature to success?	Clinical Rehabilitation	31	10	1364-1373	1			1
Spears, S.; Boarnet, M. G.; Houston, D.	2017	Driving reduction after the introduction of light rail transit: Evidence from an experimental-control group evaluation of the Los Angeles Expo Line	Urban Studies	54	12	2780-2799	1			1
Azbel-Jackson, L., Heffernan, C., Gunn, G. and Brownlie, J.	2018	Exploring the role of voluntary disease schemes on UK farmer bio-security behaviours: Findings from the Norfolk-Suffolk Bovine Viral Diarrhoea control scheme	PLoS ONE	13	2		1			1
Champagne, R., Ronzi, Y., Roche-Leboucher, G., Bègue, C., Dubus, V., Bontoux, L., Roquelaure, Y., Richard, I. and Petit, A.	2018	Effectiveness of an outpatient rehabilitation program with multidisciplinary approach on return to work for patients with non-specific chronic lombal pain	Douleurs	19	2	92-100	1			1
Garreton, J. A. Y.; Colombo, E. M.; Pattini, A. E.	2018	A global evaluation of discomfort glare metrics in real office spaces with presence of direct sunlight	Energy and Buildings	166		145-153	1			1
Schunn, C. D.; Newcombe, N. S.; Alfieri, L.; Cromley, J. G.; Massey, C.; Merlino, J. F.	2018	Using principles of cognitive science to improve science learning in middle school: What works when and for whom?	Applied Cognitive Psychology	32	2	225-240	1			1
							103	19	18	60

## Sheet: Wickström & Bendix 2000
Wickström & Bendix 2000							Aff	Neut	Neg	Citing as aff
Cundiff, G. W., Weidner, A. C. and Visco, A. G.	2001	Effectiveness of laparoscopic cadaveric dissection in enhancing resident comprehension of pelvic anatomy	Journal of the American College of Surgeons	192	4	492-497	1			1
Henke, C. J., Genco, R. J., Killoy, W. J., Miller, D. P., Evans, C. J. and Finkelman, R. D.	2001	An economic evaluation of a chlorhexidine chip for treating chronic periodontitis - The CHIP (CHlorhexidine In Periodontitis) study	Journal of the American Dental Association	132	11	1557-1569		1
Roland, P. S., Shoup, A. G., Shea, M. C., Richey, H. S. and Jones, D. B.	2001	Verification of improved patient outcomes with a partially implantable hearing aid, the SOUNDTEC direct hearing system	Laryngoscope	111	10	1682-1686		1
Sehgal, A. R., Leon, J. B., Siminoff, L. A., Singer, M. E., Bunosky, L. M. and Cebul, R. D.	2002	Improving the quality of hemodialysis treatment - A community-based randomized controlled trial to overcome patient-specific barriers	Jama-Journal of the American Medical Association	287	15	1961-1967	1			1
Shalansky, S. J. and Levy, A. R.	2002	Effect of number of medications on cardiovascular therapy adherence	Annals of Pharmacotherapy	36	10	1532-1539		1
Somers, A., Bauters, T., Robays, H., Bogaert, M. and Colardyn, F.	2002	Evaluation of human albumin use in a university hospital in Belgium	Pharmacy World & Science	24	3	111-116	1			1
Thielman, N. M., Rust, P. F. and Guerrant, R. L.	2002	Criterion-related validity of a diarrhea questionnaire in HIV-infected patients	Digestive Diseases and Sciences	47	7	1421-1426	1			1
Jeng, J. C., Bridgeman, A., Shivnan, L., Thornton, P. M., Alam, H., Clarke, T. J., Jablonski, K. A. and Jordan, M. H.	2003	Laser Doppler imaging determines need for excision and grafting in advance of clinical judgment: a prospective blinded trial	Burns	29	7	665-670	1			1
Leung, W. C., Lam, H. S. W., Lam, K. W., To, M. and Lee, C. P.	2003	Unexpected reduction in the incidence of birth trauma and birth asphyxia related to instrumental deliveries during the study period: was this the Hawthorne effect?	Bjog-an International Journal of Obstetrics and Gynaecology	110	3	319-322	1			1
Tinkelman, D., Corsello, P., McClure, D. and Yin, M.	2003	One-year outcomes from a disease management program for chronic obstructive pulmonary disease	Disease Management & Health Outcomes	11	1	49-59	1			1
Edwards, A. and Elwyn, G.	2004	Involving patients in decision making and communicating risk: a longitudinal evaluation of doctors' attitudes and confidence during a randomized trial	Journal of Evaluation in Clinical Practice	10	3	431-437	1			1
Jusot, J. F., Vanhems, P., Benzait, F., Berthelot, P., Patural, H., Teyssier, G., Fabry, J. and Pozzetto, B.	2004	The procedures of hygiene to control hospital-acquired diarrhoea in paediatric wards: a multicentre audit	Journal of Hospital Infection	57	1	44-51	1			1
Ruffin, M. T. and Gorenflo, D. W.	2004	Interventions fail to increase cancer screening rates in community-based primary care practices	Preventive Medicine	39	3	435-440	1			1
Brage, S., Brage, N., Franks, P. W., Ekelund, U. and Wareham, N. J.	2005	Reliability and validity of the combined heart rate and movement sensor Actiheart	European Journal of Clinical Nutrition	59	4	561-570		1
Ely, J. W., Osheroff, J. A., Chambliss, M. L., Ebell, M. H. and Rosenbaum, M. E.	2005	Answering physicians' clinical questions: Obstacles and potential solutions	Journal of the American Medical Informatics Association	12	2	217-224	1			1
Flum, D. R., Fisher, N., Thompson, J., Marcus-Smith, M., Florence, M. and Pellegrini, C. A.	2005	Washington state's approach to variability in surgical processes/outcomes: Surgical Clinical Outcomes Assessment Program (SCOAP)	Surgery	138	5	821-828	1			1
Kakebeeke, T. H., Lechner, H. E. and Knapp, P. A.	2005	The effect of passive cycling movements on spasticity after spinal cord injury: preliminary results	Spinal Cord	43	8	483-488	1			1
Nast, P. A., Avidan, M., Harris, C. B., Krauss, M. J., Jacobsohn, E., Petlin, A., Dunagan, W. C. and Fraser, V. J.	2005	Reporting and classification of patient safety events in a Cardiothoracic Intensive Care unit and cardiothoracic postoperative care unit	Journal of Thoracic and Cardiovascular Surgery	130	4	1137-1143	1			1
Perlis, M. L., McCall, W. V., Jungquist, C. R., Pigeon, W. R. and Matteson, S. E.	2005	Placebo effects in primary insomnia	Sleep Medicine Reviews	9	5	381-389	1			1
Schuurmans, M. M., Botha, P., Steyn, D., Richter, D. C. and Bolliger, C. T.	2005	Time to spirometric and exercise response in a 4-week oral corticosteroid trial for stable COPD patients	Swiss Medical Weekly	135	37-38	562-568	1			1
Barrett, B., Muller, D., Rakel, D., Rabago, D., Marchand, L. and Scheder, J.	2006	Placebo, meaning, and health	Perspectives in Biology and Medicine	49	2	178-198	1			1
Fleten, N. and Johnsen, R.	2006	Reducing sick leave by minimal postal intervention: a randomised, controlled intervention study	Occupational and Environmental Medicine	63	10	676-682	1			1
Jeffs, J. A. R., Godsland, I. F. and Johnston, D. G.	2006	Less than 50% of variation in HDL cholesterol between and within individuals, is explained by established predictors	Atherosclerosis	184	1	178-187	1			1
Kompier, M. A. J.	2006	The "Hawthorne effect" is a myth, but what keeps the story going?	Scandinavian Journal of Work Environment & Health	32	5	402-412			1
Lainscak, M. and Keber, I.	2006	Heart failure clinic in a community hospital improves outcome in heart failure patients	Swiss Medical Weekly	136	17-18	274-280	1			1
Leonard, K. and Masatu, M. C.	2006	Outpatient process quality evaluation and the Hawthorne effect	Social Science & Medicine	63	9	2330-2340	1
Massicotte, M. P., Sofronas, M. and deVeber, G.	2006	Difficulties in performing clinical trials of antithrombotic therapy in neonates and children	Thrombosis Research	118	1	153-163	1			1
Pavlovsky, M., Press, J., Peled, N. and Yagupsky, P.	2006	Blood culture contamination in pediatric patients - Young children and young doctors	Pediatric Infectious Disease Journal	25	7	611-614	1			1
Barrett, B., Rakel, D., Chewning, B., Marchand, L., Rabago, D., Brown, R., Scheder, J., Schmidt, R., Gern, J. E., Bone, K., Thomas, G., Barlow, S. and Bobula, J.	2007	Rationale and methods for a trial assessing placebo, echinacea, and doctor-patient interaction in the common cold	Explore-the Journal of Science and Healing	3	6	561-572	1			1
Bhide, A., Guven, M., Prefumo, F., Vankalayapati, P. and Thilaganathan, B.	2007	Maternal and neonatal outcome after failed ventouse delivery: Comparison of forceps versus cesarean section	Journal of Maternal-Fetal & Neonatal Medicine	20	7	541-545	1			1
Brage, S., Ekelund, U., Brage, N., Hennings, M. A., Froberg, K., Franks, P. W. and Wareham, N. J.	2007	Hierarchy of individual calibration levels for heart rate and accelerometry to measure physical activity	Journal of Applied Physiology	103	2	682-692		1
De Bruijn, C., de Bie, R., Geraets, J., Goossens, M., Koke, A., van den Heuvel, W. and Dinant, G. J.	2007	General practitioners apply the usual care for shoulder complaints better than expected - analysis of videotaped consultations	Bmc Family Practice	8		6	1			1
Finkelstein, J. and Lapshin, O.	2007	Reducing depression stigma using a web-based program	International Journal of Medical Informatics	76	10	726-734	1			1
MacKenzie, D. J. and Galbrun, L.	2007	Noise levels and noise sources in acute care hospital wards	Building Services Engineering Research & Technology	28	2	117-131	1			1
McCarney, R., Warner, J., Iliffe, S., van Haselen, R., Griffin, M. and Fisher, P.	2007	The Hawthorne Effect: a randomised, controlled trial	Bmc Medical Research Methodology	7		8	1
Payne, P. R. O., Mendonca, E. A., Johnson, S. B. and Starren, J. B.	2007	Conceptual knowledge acquisition in biomedicine: A methodological review	Journal of Biomedical Informatics	40	5	582-602	1			1
Rathe, F., Auschill, T. M., Sculean, A., Gaudszuhn, C. and Arweiler, N. B.	2007	The plaque and gingivitis reducing effect of a chlorhexidine and aluminium lactate containing dentifrice (Lacalut aktiv (R)) over a period of 6 months	Journal of Clinical Periodontology	34	8	646-651	1
Shuval, K., Berkovits, E., Netzer, D., Hekselman, I., Linn, S., Brezis, M. and Reis, S.	2007	Evaluating the impact of an evidence-based medicine educational intervention on primary care doctors' attitudes, knowledge and clinical behaviour: a controlled trial and before and after study	Journal of Evaluation in Clinical Practice	13	4	581-598	1			1
Zeller, A., Schroeder, K. and Peters, T. J.	2007	Electronic pillboxes (MEMS) to assess the relationship between medication adherence and blood pressure control in primary care	Scandinavian Journal of Primary Health Care	25	4	202-207		1
Chiriboga, D. E., Ma, Y., Li, W., Olendzki, B. C., Pagoto, S. L., Merriam, P. A., Matthews, C. E., Hebert, J. R. and Ockene, I. S.	2008	Gender differences in predictors of body weight and body weight change in healthy adults	Obesity	16	1	137-145	1			1
Harvey, P. W., Petkov, J. N., Misan, G., Fuller, J., Battersby, M. W., Cayetano, T. N., Warren, K. and Holmes, P.	2008	Self-management support and training for patients with chronic and complex conditions improves health-related behaviour and health outcomes	Australian Health Review	32	2	330-338	1			1
Kiekkas, P., Sakellaropoulos, G. C., Brokalaki, H., Manolis, E., Samios, A., Skartsani, C. and Baltopoulos, G. I.	2008	NURSING WORKLOAD ASSOCIATED WITH FEVER IN THE GENERAL INTENSIVE CARE UNIT	American Journal of Critical Care	17	6	522-531	1			1
Leonard, K. L.	2008	Is patient satisfaction sensitive to changes in the quality of care? An exploitation of the Hawthorne effect	Journal of Health Economics	27	2	444-459	1
Mowinckel, P., Hagen, K. B., Heiberg, T. and Kvien, T. K.	2008	Repeated measures in rheumatoid arthritis reduced the required sample size in a two-armed clinical trial	Journal of Clinical Epidemiology	61	9	940-944	1			1
Richards, N., Harris, K., Whitfield, M., O'Donoghue, D., Lewis, R., Mansell, M., Thomas, S., Townend, J., Eames, M. and Marcelli, D.	2008	Primary care-based disease management of chronic kidney disease (CKD), based on estimated glomerular filtration rate (eGFR) reporting, improves patient outcomes	Nephrology Dialysis Transplantation	23	2	549-555	1			1
Stegle, O., Fallert, S. V., MacKay, D. J. C. and Brage, S.	2008	Gaussian process robust regression for noisy heart rate data	Ieee Transactions on Biomedical Engineering	55	9	2143-2151		1
Zeller, A., Ramseier, E., Teagtmeyer, A. and Battegay, E.	2008	Patients' Self-Reported Adherence to Cardiovascular Medication Using Electronic Monitors as Comparators	Hypertension Research	31	11	2037-2043	1			1
Zeller, A., Schroeder, K. and Peters, T. J.	2008	An adherence self-report questionnaire facilitated the differentiation between nonadherence and nonresponse to antihypertensive treatment	Journal of Clinical Epidemiology	61	3	282-288	1			1
Zeller, A., Taegtmeyer, A., Martina, B., Battegay, E. and Tschudi, P.	2008	Physicians' Ability to Predict Patients' Adherence to Antihypertensive Medication in Primary Care	Hypertension Research	31	9	1765-1771	1			1
Aspenes, S., Kjendlie, P. L., Hoff, J. and Helgerud, J.	2009	Combined strength and endurance training in competitive swimmers	Journal of Sports Science and Medicine	8	3	357-365	1			1
Ebrahimi, M., Ghayour-Mobarhan, M., Rezaiean, S., Hoseini, M., Parizade, S. M. R., Farhoudi, F., Hosseininezhad, S. J., Tavallaei, S., Vejdani, A., Azimi-Nezhad, M., Shakeri, M. T., Rad, M. A., Mobarra, N., Kazemi-Bajestani, S. M. R. and Ferns, G. A. A.	2009	Omega-3 fatty acid supplements improve the cardiovascular risk profile of subjects with metabolic syndrome, including markers of inflammation and auto-immunity	Acta Cardiologica	64	3	321-327	1			1
Fratino, L. M., Daniel, D. A., Cohen, K. J. and Chen, A. R.	2009	Evaluation of Quality Improvement Initiative in Pediatric Oncology Implementation of Aggressive Hydration Protocol	Journal of Nursing Care Quality	24	2	153-159	1			1
Laustsen, S., Lund, E., Bibby, B. M., Kristensen, B., Thulstrup, A. M. and Moller, J. K.	2009	Cohort Study of Adherence to Correct Hand Antisepsis Before and After Performance of Clinical Procedures	Infection Control and Hospital Epidemiology	30	2	172-178	1			1
Luck, H. E.	2009	The Hawthorne effect - an effect for many occasions?	Gruppendynamik Und Organisationsberatung	40	1	102-114			1
Turkoglu, O., Becerik, S., Emingil, G., Kutukculer, N., Baylas, H. and Atilla, G.	2009	The effect of adjunctive chlorhexidine mouthrinse on clinical parameters and gingival crevicular fluid cytokine levels in untreated plaque-associated gingivitis	Inflammation Research	58	5	277-283	1			1
Valentini, L., Schindler, K., Schlaffer, R., Bucher, H., Mouhieddine, M., Steininger, K., Tripamer, J., Handschuh, M., Schuh, C., Volkert, D., Lochs, H., Sieber, C. C. and Hiesmayr, M.	2009	The first nutritionDay in nursing homes: Participation may improve malnutrition awareness	Clinical Nutrition	28	2	109-116	1			1
Ausset, S., Auroy, Y., Verret, C., Benhamou, D., Vest, P., Cirodde, A. and Lenoir, B.	2010	Quality of Postoperative Care after Major Orthopedic Surgery Is Correlated with Both Long-term Cardiovascular Outcome and Troponin Ic Elevation	Anesthesiology	113	3	529-540	1			1
Chuo, Y., Marzencki, M., Hung, B., Jaggernauth, C., Tavakolian, K., Lin, P. and Kaminska, B.	2010	Mechanically Flexible Wireless Multisensor Platform for Human Physical Activity and Vitals Monitoring	Ieee Transactions on Biomedical Circuits and Systems	4	5	281-294	1			1
Kvadsheim, R., Mehlen, M. and Kittang, H.	2010	Web-Based Automatic Feedback on Assignments in Statistics: How Can it Help Students Learn Statistics and Universities Reduce Costs?	International Journal of Engineering Education	26	3	642-654	1			1
Leonard, K. L. and Masatu, M. C.	2010	Using the Hawthorne effect to examine the gap between a doctor's best possible practice and actual performance	Journal of Development Economics	93	2	226-234	1
Linton, A., Bacon, T. A., Trice, S., Devine, J., Cottrell, L., McGinnis, T. J. and McAllister, E. B.	2010	Results from a Mailed Promotion of Medication Reviews Among Department of Defense Beneficiaries Receiving 10 or More Chronic Medications	Journal of Managed Care Pharmacy	16	8	578-592	1			1
Manassaram, D. M., Backer, L. C., Messing, R., Fleming, L. E., Luke, B. and Monteilh, C. P.	2010	Nitrates in drinking water and methemoglobin levels in pregnancy: a longitudinal study	Environmental Health	9		12	1			1
Morton, J. M. and Wynn, P. C.	2010	Assessing ovulation detection performance in commercial dairy herds using progesterone concentrations from limited numbers of strategically collected milk samples	Journal of Dairy Science	93	7	3019-3030	1			1
Rodriguez-Molinero, A., Lopez-Dieguez, M., Tabuenca, A. I., de la Cruz, J. J. and Banegas, J. R.	2010	Physicians' impression on the elders' functionality influences decision making for emergency care	American Journal of Emergency Medicine	28	7	757-765	1			1
Shi, L. Z., Liu, J. N., Koleva, Y., Fonseca, V., Kalsekar, A. and Pawaskar, M.	2010	Concordance of Adherence Measurement Using Self-Reported Adherence Questionnaires and Medication Monitoring Devices	Pharmacoeconomics	28	12	1097-1107		1
Singh, A., Syal, M., Grady, S. C. and Korkmaz, S.	2010	Effects of Green Buildings on Employee Health and Productivity	American Journal of Public Health	100	9	1665-1668		1
Turp, J. C., Sedivy, R., Schlaeppi, M. R., Spranger, H. and Endler, C.	2010	Limits and Benefits of Non-Controlled Therapy-Related Observations	Forschende Komplementarmedizin	17	6	336-342	1			1
Van Orden, G. C., Kello, C. T. and Holden, J. G.	2010	Situated Behavior and the Place of Measurement in Psychological Theory	Ecological Psychology	22	1	24-43		1
Watkinson, C., van Sluijs, E. M. F., Sutton, S., Marteau, T. and Griffin, S. J.	2010	Randomised controlled trial of the effects of physical activity feedback on awareness and behaviour in UK adults: the FAB study protocol ISRCTN92551397	Bmc Public Health	10		10	1			1
Campion, T. R., Waitman, L. R., Lorenzi, N. M., May, A. K. and Gadd, C. S.	2011	Barriers and facilitators to the use of computer-based intensive insulin therapy	International Journal of Medical Informatics	80	12	863-871	1			1
Fortuin, M. F., Schilperoort, J., Evans, B. J. W., Edgar, D. F., Manon, H. M. T. and Kiers, H.	2011	Randomised controlled study comparing comfort-related outcomes between two rigid gas permeable (RGP) lenses with different sessile drop contact angles	Ophthalmic and Physiological Optics	31	2	190-199	1			1
Kindblom-Rising, K., Wahlstrom, R., Nilsson-Wikmar, L. and Buer, N.	2011	Nursing staff's movement awareness, attitudes and reported behaviour in patient transfer before and after an educational intervention	Applied Ergonomics	42	3	455-463	1			1
Kottner, J., Audige, L., Brorson, S., Donner, A., Gajewski, B. J., Hrobjartsson, A., Roberts, C., Shoukri, M. and Streiner, D. L.	2011	Guidelines for Reporting Reliability and Agreement Studies (GRRAS) were proposed	Journal of Clinical Epidemiology	64	1	96-106	1			1
Martin, B. R.	2011	The Research Excellence Framework and the 'impact agenda': are we creating a Frankenstein monster?	Research Evaluation	20	3	247-254	1			1
McCall, W. V., D'Agostino, R., Rosenquist, P. B., Kimball, J., Boggs, N., Lasater, B. and Blocker, J.	2011	Dissection of the factors driving the placebo effect in hypnotic treatment of depressed insomniacs	Sleep Medicine	12	6	557-564	1			1
Milosavljevic, M., Williams, P., Perez, G. and Dalla, T.	2011	The results of a pilot time-and-motion study in three Australian hospitals: Where do we spend our time?	Nutrition & Dietetics	68	3	185-188	1			1
Ronk, C. J., Dennerlein, J. T., Hoffman, E. and Perry, M. J.	2011	Is Renovation Riskier Than New Construction? An Observational Comparison of Risk Factors for Stepladder-Related Falls	American Journal of Industrial Medicine	54	8	579-585	1			1
Andersen, F., Viitanen, M., Halvorsen, D. S., Straume, B., Wilsgaard, T. and Engstad, T. A.	2012	The effect of stimulation therapy and donepezil on cognitive function in Alzheimer's disease. A community based RCT with a two-by-two factorial design	Bmc Neurology	12		10	1			1
Bresjanac, M.	2012	Placebo effect mechanisms	Zdravniski Vestnik-Slovenian Medical Journal	81	12	876-893	1
Faurholt-Jepsen, M., Brage, S., Vinberg, M., Christensen, E. M., Knorr, U., Jensen, H. M. and Kessing, L. V.	2012	Differences in psychomotor activity in patients suffering from unipolar and bipolar affective disorder in the remitted or mild/moderate depressive state	Journal of Affective Disorders	141	2018-03-02	457-463		1
Groen, B. A. C., Wouters, M. J. F. and Wilderom, C. P. M.	2012	Why do employees take more initiatives to improve their performance after co-developing performance measures? A field study	Management Accounting Research	23	2	120-141	1			1
Guimaraes, L. B. D., Ribeiro, J. L. D. and Renner, J. S.	2012	Cost-benefit analysis of a socio-technical intervention in a Brazilian footwear company	Applied Ergonomics	43	5	948-957			1
Kaewchana, S., Simmerman, M., Somrongthong, R., Suntarattiwong, P., Lertmaharit, S. and Chotipitayasunondh, T.	2012	Effect of Intensive Hand Washing Education on Hand Washing Behaviors in Thai Households with an Influenza-Positive Child in Urban Thailand	Asia-Pacific Journal of Public Health	24	4	577-585	1			1
Leboucher, B., Sentilhes, L., Abbou, F., Henry, E., Grimprel, E. and Descamps, P.	2012	Impact of postpartum information about pertussis booster to parents in a university maternity hospital	Vaccine	30	37	5472-5481	1			1
Lindegard, A., Gustafsson, M. and Hansson, G. A.	2012	Effects of prismatic glasses including optometric correction on head and neck kinematics, perceived exertion and comfort during dental work in the oral cavity - A randomised controlled intervention	Applied Ergonomics	43	1	246-253	1			1
Manzi, F., Schellenberg, J. A., Hutton, G., Wyss, K., Mbuya, C., Shirima, K., Mshinda, H., Tanner, M. and Schellenberg, D.	2012	Human resources for health care delivery in Tanzania: a multifaceted problem	Human Resources for Health	10		10	1			1
Michael, R. B., Garry, M. and Kirsch, I.	2012	Suggestion, Cognition, and Behavior	Current Directions in Psychological Science	21	3	151-156	1
Page, M., Taylor, J. and Blenkin, M.	2012	Context Effects and Observer Bias-Implications for Forensic Odontology	Journal of Forensic Sciences	57	1	108-112	1			1
Payne, P. R. O.	2012	Chapter 1: Biomedical Knowledge Integration	Plos Computational Biology	8	12	15	1			1
Schopf, T. and Flytkjaer, V.	2012	Impact of Interactive Web-Based Education With Mobile and Email-Based Support of General Practitioners on Treatment and Referral Patterns of Patients with Atopic Dermatitis: Randomized Controlled Trial	Journal of Medical Internet Research	14	6	88-99		1
van Gestel-Timmermans, H., Brouwers, E. P. M., van Assen, Malm and van Nieuwenhuizen, C.	2012	Effects of a Peer-Run Course on Recovery From Serious Mental Illness: A Randomized Controlled Trial	Psychiatric Services	63	1	54-60	1			1
Acosta, F. J., Ramallo-Farina, Y., Bosch, E., Mayans, T., Rodriguez, C. J. and Caravaca, A.	2013	Antipsychotic treatment dosing profile in patients with schizophrenia evaluated with electronic monitoring (MEMS (R))	Schizophrenia Research	146	2018-03-01	196-200		1
Carlsen, E. M., Kyhnaeb, A., Renault, K. M., Cortes, D., Michaelsen, K. F. and Pryds, O.	2013	Telephone-based support prolongs breastfeeding duration in obese women: a randomized trial	American Journal of Clinical Nutrition	98	5	1226-1232		1
Colom, R., Roman, F. J., Abad, F. J., Shih, P. C., Privado, J., Froufe, M., Escorial, S., Martinez, K., Burgaleta, M., Quiroga, M. A., Karama, S., Haier, R. J., Thompson, P. M. and Jaeggi, S. M.	2013	Adaptive n-back training does not improve fluid intelligence at the construct level: Gains on individual tests suggest that training may enhance visuospatial processing	Intelligence	41	5	712-727		1
Crema, M. and Verbano, C.	2013	Guidelines for overcoming hospital managerial challenges: a systematic literature review	Therapeutics and Clinical Risk Management	9		427-441		1
de Jong, A., Molinari, N., de Lattre, S., Gniadek, C., Carr, J., Conseil, M., Susbielles, M. P., Jung, B., Jaber, S. and Chanques, G.	2013	Decreasing severe pain and serious adverse events while moving intensive care unit patients: a prospective interventional study (the NURSE-DO project)	Critical Care	17	2	13	1			1
Freires, I. D., Alves, L. A., Ferreira, G. L. S., Jovito, V. D., de Castro, R. D. and Cavalcanti, A. L.	2013	A Randomized Clinical Trial of Schinus terebinthifolius Mouthwash to Treat Biofilm-Induced Gingivitis	Evidence-Based Complementary and Alternative Medicine			8	1			1
Hutting, N., Staal, J. B., Heerkens, Y. F., Engels, J. A. and Nijhuis-van der Sanden, M. W. G.	2013	A self-management program for employees with complaints of the arm, neck, or shoulder (CANS): study protocol for a randomized controlled trial	Trials	14		11	1			1
Makarov, D. V., Loeb, S., Ulmert, D., Drevin, L., Lambe, M. and Stattin, P.	2013	Prostate Cancer Imaging Trends After a Nationwide Effort to Discourage Inappropriate Prostate Cancer Imaging	Jnci-Journal of the National Cancer Institute	105	17	1306-1313	1			1
McVeigh, T. P., Waters, P. S., Murphy, R., O'Donoghue, G. T., McLaughlin, R. and Kerin, M. J.	2013	Increasing Reporting of Adverse Events to Improve the Educational Value of the Morbidity and Mortality Conference	Journal of the American College of Surgeons	216	1	50-56	1			1
Meinert, M., Konig, M. and Jaschinski, W.	2013	Web-based office ergonomics intervention on work-related complaints: a field study	Ergonomics	56	11	1658-1668			1
Murni, I., Duke, T., Triasih, R., Kinney, S., Daley, A. J. and Soenarto, Y.	2013	Prevention of nosocomial infections in developing countries, a systematic review	Paediatrics and International Child Health	33	2	61-78	1			1
Rader, F., Elashoff, R. M., Niknezhad, S. and Victor, R. G.	2013	Differential Treatment of Hypertension by Primary Care Providers and Hypertension Specialists in a Barber-Based Intervention Trial to Control Hypertension in Black Men	American Journal of Cardiology	112	9	1421-1426	1			1
Shu, C. C., Wu, V. C., Yang, F. J., Hsu, C. L., Pan, S. C., Wang, J. Y., Wang, J. T., Yu, C. J. and Lee, L. N.	2013	Dynamic changes in positive interferon-gamma release assay in a dialysis population: An observational cohort study	Journal of Infection	67	6	529-535	1			1
Arnold, M. H., Finniss, D. G. and Kerridge, I.	2014	Medicine's inconvenient truth: the placebo and nocebo effect	Internal Medicine Journal	44	4	398-405	1			1
Clark, N. E., Lovell, R., Wheeler, B. W., Higgins, S. L., Depledge, M. H. and Norris, K.	2014	Biodiversity, cultural pathways, and human health: a framework	Trends in Ecology & Evolution	29	4	198-204	1			1
Dossegger, A., Ruch, N., Jimmy, G., Braun-Fahrlander, C., Mader, U., Hanggi, J., Hofmann, H., Puder, J. J., Kriemler, S. and Bringolf-Isler, B.	2014	Reactivity to Accelerometer Measurement of Children and Adolescents	Medicine and Science in Sports and Exercise	46	6	1140-1146	1			1
Eriksson, L. O., Wahlberg, O. and Nilsson, M.	2014	Questioning the contemporary forest planning paradigm: making use of local knowledge	Scandinavian Journal of Forest Research	29		56-70		1
Falcoz, P. E., Puyraveau, M., Rivera, C., Bernard, A., Massard, G., Mauny, F., Dahan, M., Thomas, P. A. and Epithor, Grp	2014	The impact of hospital and surgeon volume on the 30-day mortality of lung cancer surgery: A nation-based reappraisal	Journal of Thoracic and Cardiovascular Surgery	148	3	841-848	1			1
Fassett, R. G., Geraghty, D. P. and Coombes, J. S.	2014	The impact of pre-intervention rate of kidney function change on the assessment of CKD progression	Journal of Nephrology	27	5	515-519		1
Faurholt-Jepsen, M., Faurholt-Jepsen, D., Range, N., Praygod, G., Jeremiah, K., Aabye, M. G., Changalucha, J., Krarup, H., Christensen, D. L., Andersen, A. B., Brage, S. and Friis, H.	2014	The use of combined heart rate response and accelerometry to assess the level and predictors of physical activity in tuberculosis patients in Tanzania	Epidemiology and Infection	142	6	1334-1342	1			1
Fortes-Garrido, J. C., Velez-Pereira, A. M., Gazquez, M., Hidalgo-Hidalgo, M. and Bolivar, J. P.	2014	The characterization of noise levels in a neonatal intensive care unit and the implications for noise management	Journal of Environmental Health Science and Engineering	12		8	1			1
Goyder, E., Hind, D., Breckon, J., Dimairo, M., Minton, J., Everson-Hock, E., Read, S., Copeland, R., Crank, H., Horspool, K., Humphreys, L., Hutchison, A., Kesterton, S., Latimer, N., Scott, E., Swaile, P., Walters, S. J., Wood, R., Collins, K. and Cooper, C.	2014	A randomised controlled trial and cost-effectiveness evaluation of 'booster' interventions to sustain increases in physical activity in middle-aged adults in deprived urban neighbourhoods	Health Technology Assessment	18	13	1-+	1			1
Guimaraes, L. B. D., Ribeiro, J. L. D., Renner, J. S. and de Oliveira, P. A. B.	2014	Worker evaluation of a macroergonomic intervention in a Brazilian footwear company	Applied Ergonomics	45	4	923-935	1
Ickmans, K., Simoens, F., Nijs, J., Kos, D., Cras, P., Willekens, B. and Meeus, M.	2014	Recovery of peripheral muscle function from fatiguing exercise and daily physical activity level in patients with multiple sclerosis: A case-control study	Clinical Neurology and Neurosurgery	122		97-105	1			1
McCambridge, J., Witton, J. and Elbourne, D. R.	2014	Systematic review of the Hawthorne effect: New concepts are needed to study research participation effects	Journal of Clinical Epidemiology	67	3	267-277			1
Ramsay, A. I. G., Turner, S., Cavell, G., Oborne, C. A., Thomas, R. E., Cookson, G. and Fulop, N. J.	2014	Governing patient safety: lessons learned from a mixed methods evaluation of implementing a ward-level medication safety scorecard in two English NHS hospitals	Bmj Quality & Safety	23	2	136-146	1			1
Schilp, J., Boot, S., de Blok, C., Spreeuwenberg, P. and Wagner, C.	2014	Protocol compliance of administering parenteral medication in Dutch hospitals: an evaluation and cost estimation of the implementation	Bmj Open	4	12	8	1			1
Simmons, L. A., Wolever, R. Q., Bechard, E. M. and Snyderman, R.	2014	Patient engagement as a risk factor in personalized health care: a systematic review of the literature on chronic disease	Genome Medicine	6		13	1			1
Baak, B., Bock, O., Dovern, A., Saliger, J., Karbe, H. and Weiss, P. H.	2015	Deficits of reach-to-grasp coordination following stroke: Comparison of instructed and natural movements	Neuropsychologia	77		2018-09-01	1			1
Brage, S., Westgate, K., Franks, P. W., Stegle, O., Wright, A., Ekelund, U. and Wareham, N. J.	2015	Estimation of Free-Living Energy Expenditure by Heart Rate and Movement Sensing: A Doubly-Labelled Water Study	Plos One	10	9	19	1			1
Brown, S. J. S. and Furber, C. M.	2015	Women's experiences of cervical ripening as inpatients on an antenatal ward	Sexual & Reproductive Healthcare	6	4	219-225	1			1
Butze, J. P., Angst, P. D. M., Oppermann, R. V. and Gomes, S. C.	2015	Periodontal risk and recall interval evaluation after a program of comprehensive supragingival plaque control	Quintessence International	46	9	765-772	1			1
Chen, L. F., Vander, M. W., Hofmann, D. A. and Reisinger, H. S.	2015	The Hawthorne Effect in Infection Prevention and Epidemiology	Infection Control and Hospital Epidemiology	36	12	1444-1450	1
Choi, Y. K., Han, J. H., Li, R., Kung, K. and Lam, A.	2015	Implementation of secondary stroke prevention protocol for ischaemic stroke patients in primary care	Hong Kong Medical Journal	21	2	136-142	1			1
Faurholt-Jepsen, M., Brage, S., Vinberg, M., Jensen, H. M., Christensen, E. M., Knorr, U. and Kessing, L. V.	2015	Electronic monitoring of psychomotor activity as a supplementary objective measure of depression severity	Nordic Journal of Psychiatry	69	2	118-125		1
Fuhrmann, L., Pedersen, T. H., Atke, A., Moller, A. M. and Ostergaard, D.	2015	Multidisciplinary team training reduces the decision-to-delivery interval for emergency Caesarean section	Acta Anaesthesiologica Scandinavica	59	10	1287-1295	1			1
Hall, D. E., Hanusa, B. H., Fine, M. J. and Arnold, R. M.	2015	Do surgeons and patients discuss what they document on consent forms?	Journal of Surgical Research	197	1	67-77	1
Hutting, N., Staal, J. B., Engels, J. A., Heerkens, Y. F., Detaille, S. I. and Nijhuis-van der Sanden, M. W. G.	2015	Effect evaluation of a self-management programme for employees with complaints of the arm, neck or shoulder: a randomised controlled trial	Occupational and Environmental Medicine	72	12	852-861	1			1
Kim, R. H. and Tan, T. W.	2015	Interventions That Affect Resident Performance on the American Board of Surgery In-Training Examination: A Systematic Review	Journal of Surgical Education	72	3	418-429	1
Moran, S., Bachour, K. and Nishida, T.	2015	User perceptions of anthropomorphic robots as monitoring devices	Ai & Society	30	1	2021-01-01	1
Njoroge, R., Birech, R., Arusey, C., Korir, M., Mutisya, C. and Scholz, R. W.	2015	Transdisciplinary processes of developing, applying, and evaluating a method for improving smallholder farmers' access to (phosphorus) fertilizers: the SMAP method	Sustainability Science	10	4	601-619	1			1
Northway, T., Krahn, G., Thibault, K., Yarske, L., Yuskiv, N., Kissoon, N. and Collet, J. P.	2015	Surgical Suite to Pediatric Intensive Care Unit Handover Protocol Implementation Process and Long-term Sustainability	Journal of Nursing Care Quality	30	2	113-120	1			1
Ohlendorf, D., Schwarzer, M., Rey, J., Hermanns, I., Nienhaus, A., Ellegast, R., Ditchen, D., Mache, S. and Groneberg, D. A.	2015	Medical work assessment in German hospitals: a study protocol of a movement sequence analysis (MAGRO-MSA)	Journal of Occupational Medicine and Toxicology	10		8	1			1
Rieken, J., Garcia-Sanchez, E., Trujillo, M. P. and Bear, D.	2015	Digital Ethnography and the Social Dimension of Introspection: An Empirical Study in Two Colombian Schools	Integrative Psychological and Behavioral Science	49	2	253-274	1			1
Runyan, J. D. and Steinke, E. G.	2015	Virtues, ecological momentary assessment/intervention and smartphone technology	Frontiers in Psychology	6		24		1
Sacks, G. D., Shannon, E. M., Dawes, A. J., Rollo, J. C., Nguyen, D. K., Russell, M. M., Ko, C. Y. and Maggard-Gibbons, M. A.	2015	Teamwork, communication and safety climate: a systematic review of interventions to improve surgical culture	Bmj Quality & Safety	24	7	458-467	1			1
Blank, M. D., Breland, A. B., Enlow, P. T., Duncan, C., Metzger, A. and Cobb, C. O.	2016	Measurement of Smoking Behavior: Comparison of Self-Reports, Returned Cigarette Butts, and Toxicant Levels	Experimental and Clinical Psychopharmacology	24	5	348-355	1			1
Dewi, C., Barclay, L., Passey, M. and Wilson, S.	2016	Improving knowledge and behaviours related to the cause, transmission and prevention of Tuberculosis and early case detection: a descriptive study of community led Tuberculosis program in Flores, Indonesia	Bmc Public Health	16		12	1			1
Edwards, J. R. and Rosin, P.	2016	A Prekindergarten Curriculum Supplement for Enhancing Mainstream American English Knowledge in Nonmainstream American English Speakers	Language Speech and Hearing Services in Schools	47	2	113-122	1			1
Farzin, B., Fahed, R., Guilbert, F., Poppe, A. Y., Daneault, N., Durocher, A. P., Lanthier, S., Boudjani, H., Khoury, N. N., Roy, D., Weill, A., Gentric, J. C., Batista, A. L., Letourneau-Guillon, L., Bergeron, F., Henry, M. A., Darsaut, T. E. and Raymond, J.	2016	Early CT changes in patients admitted for thrombectomy Intrarater and interrater agreement	Neurology	87	3	249-256	1			1
Faurholt-Jepsen, M., Brage, S., Vinberg, M. and Kessing, L. V.	2016	State-related differences in the level of psychomotor activity in patients with bipolar disorder - Continuous heart rate and movement monitoring	Psychiatry Research	237		166-174		1
Faurholt-Jepsen, M., Vinberg, M., Frost, M., Debel, S., Christensen, E. M., Bardram, J. E. and Kessing, L. V.	2016	Behavioral activities collected through smartphones and the association with illness activity in bipolar disorder	International Journal of Methods in Psychiatric Research	25	4	309-323	1			1
Foley, M. K. H., Anderson, J., Mallea, L., Morrison, K. and Downey, M.	2016	Effects of Healing Touch on Postsurgical Adult Outpatients	Journal of Holistic Nursing	34	3	271-279	1			1
Forshaw, J., Raybould, S., Lewis, E., Muyingo, M., Weeks, A., Reed, K., Manikam, L. and Byamugisha, J.	2016	Exploring the third delay: an audit evaluating obstetric triage at Mulago National Referral Hospital	Bmc Pregnancy and Childbirth	16		8	1			1
Graff, I., Goldschmidt, B., Glien, P., Klockner, S., Erdfelder, F., Schiefer, J. L. and Grigutsch, D.	2016	Nurse Staffing Calculation in the Emergency Department - Performance-Oriented Calculation Based on the Manchester Triage System at the University Hospital Bonn	Plos One	11	5	11	1			1
Harvey, P.	2016	Effectiveness and efficiency in the treatment of gambling disorder: reflections on the Dodo Bird Conjecture	Journal of Health Services Research & Policy	21	3	178-182	1			1
Jeyashree, K., Kathirvel, S., Shewade, H. D., Kaur, H. and Goel, S.	2016	Smoking cessation interventions for pulmonary tuberculosis treatment outcomes	Cochrane Database of Systematic Reviews		1	23	1			1
Kadhel, P., Delrieu, D., Deloumeaux, J., Ryan, C. and Janky, E.	2016	Characterization of potentially avoidable cases in a 1-year series of consecutive cesarean sections in the tertiary maternity unit of Guadeloupe (French West Indies)	Journal of Obstetrics and Gynaecology Research	42	8	944-950	1			1
Lantz, B. and Rosen, P.	2016	Measuring effective capacity in an emergency department	Journal of Health Organization and Management	30	1	73-84	1			1
Larby, A., Roberts, S. and Desbrow, B.	2016	Accuracy and adequacy of food supplied in therapeutic diets to hospitalised patients: An observational study	Nutrition & Dietetics	73	4	342-347	1			1
Leurent, B., Reyburn, H., Muro, F., Mbakilwa, H. and Schellenberg, D.	2016	Monitoring patient care through health facility exit interviews: an assessment of the Hawthorne effect in a trial of adherence to malaria treatment guidelines in Tanzania	Bmc Infectious Diseases	16		9	1
Lu, X. Q. and Davis, S.	2016	How sounds influence user safety decisions in a virtual construction simulator	Safety Science	86		184-194	1			1
Nowak, J., Erbe, C., Hauck, I., Groneberg, D. A., Hermanns, I., Ellegast, R., Ditchen, D. and Ohlendorf, D.	2016	Motion analysis in the field of dentistry: a kinematic comparison of dentists and orthodontists	Bmj Open	6	8	10	1			1
Ohlendorf, D., Mickel, C., Filmann, N., Wanke, E. M. and Groneberg, D. A.	2016	Standard values of the upper body posture and postural control: a study protocol	Journal of Occupational Medicine and Toxicology	11		13	1			1
Pedersen, S., Gronhoj, A. and Thogersen, J.	2016	Texting your way to healthier eating? Effects of participating in a feedback intervention using text messaging on adolescents' fruit and vegetable intake	Health Education Research	31	2	171-184	1			1
Peng, F. S., Lin, H. M., Lin, H. H., Tu, F. C., Hsiao, C. F. and Hsiao, S. M.	2016	Impact of clinical audits on cesarean section rate	Taiwanese Journal of Obstetrics & Gynecology	55	4	530-533	1			1
Pieri, M., Bellomo, R., Zangrillo, A., Winterton, D. and Landoni, G.	2016	Evolving from Past to Future: Facilitating SMART research	Signa Vitae	12	1	14-18	1			1
Sabin, J., Khan, W., Subbe, C. P., Franklin, M., Abulela, I., Khan, A. and Mohammed, H.	2016	'The time it takes...' How doctors spend their time admitting a patient during the acute medical take	Clinical Medicine	16	4	320-324	1			1
Schwarz, K. A., Pfister, R. and Buchel, C.	2016	Rethinking Explicit Expectations: Connecting Placebos, Social Cognition, and Contextual Perception	Trends in Cognitive Sciences	20	6	469-480	1			1
Schwarz, U. V., Hasson, H. and Tafvelin, S.	2016	Leadership training as an occupational health intervention: Improved safety and sustained productivity	Safety Science	81		35-45	1			1
Tirkkonen, J., Olkkola, K. T., Tenhunen, J. and Hoppu, S.	2016	Ethically justified treatment limitations in emergency situations	European Journal of Emergency Medicine	23	3	214-218	1			1
Vet, N. J., de Wildt, S. N., Verlaat, C. W. M., Knibbe, C. A. J., Mooij, M. G., van Woensel, J. B. M., van Rosmalen, J., Tibboel, D. and de Hoog, M.	2016	A randomized controlled trial of daily sedation interruption in critically ill children	Intensive Care Medicine	42	2	233-244	1			1
Ahmed, S., Taskin, N., Pauleen, D. and Parker, J.	2017	Motivating Information Technology Professionals: The case of New Zealand	Australasian Journal of Information Systems	21		30		1
Britto, M. T., Rohan, J. M., Dodds, C. M. and Byczkowski, T. L.	2017	A Randomized Trial of User-Controlled Text Messaging to Improve Asthma Outcomes: A Pilot Study	Clinical Pediatrics	56	14	1336-1344	1			1
Chanques, G., Conseil, M., Roger, C., Constantin, J. M., Prades, A., Carr, J., Muller, L., Jung, B., Belafia, F., Cisse, M., Delay, J. M., de Jong, A., Lefrant, J. Y., Futier, E., Mercier, G., Molinari, N., Jaber, S. and Investiga, S. OS-Ventilation Study	2017	Immediate interruption of sedation compared with usual sedation care in critically ill postoperative patients (SOS-Ventilation): a randomised, parallel-group clinical trial	Lancet Respiratory Medicine	5	10	795-805	1			1
De Groef, A., Van Kampen, M., Vervloesem, N., Clabau, E., Christiaens, M. R., Neven, P., Geraerts, I., Struyf, F. and Devoogdt, N.	2017	Inter-rater reliability of shoulder measurements in middle-aged women	Physiotherapy	103	2	222-230	1			1
De Groef, A., Van Kampen, M., Vervloesem, N., De Geyter, S., Dieltjens, E., Christiaens, M. R., Neven, P., Geraerts, I. and Devoogdt, N.	2017	An evaluation tool for myofascial adhesions in patients after breast cancer (MAP-BC evaluation tool): Development and interrater reliability	Plos One	12	6	10	1			1
D'Souza, S. R. B., Lewis, L. E., Kumar, V., Bhat, Y. R., Purkayastha, J. and Prakash, H.	2017	Ambient Noise Levels in Acute Neonatal Intensive Care Unit of a Tertiary Referral Hospital	Journal of Krishna Institute of Medical Sciences University	6	4	50-58	1			1
Engstrom, J., Bruno, E., Reinius, H., Frojd, C., Jonsson, H., Sannervik, J. and Larsson, A.	2017	Physiological changes associated with routine nursing procedures in critically ill are common: an observational pilot study	Acta Anaesthesiologica Scandinavica	61	1	62-72	1			1
Gregoriano, C., Dieterle, T., Durr, S., Arnet, I., Hersberger, K. E. and Leuppi, J. D.	2017	Impact of an Electronic Monitoring Intervention to Improve Adherence to Inhaled Medication in Patients with Asthma and Chronic Obstructive Pulmonary Disease: Study Protocol for a Randomized Controlled Trial	Jmir Research Protocols	6	10	12		1
Lantz, B. and Rosen, P.	2017	Using queueing models to estimate system capacity	Production Planning & Control	28	13	1037-1046	1			1
Lessing, C., Strass, C., Standke, H. J. and Lux, R.	2017	Can Quality of Patient Identification be Influenced by Training? - Results of a Randomised Multicentre Study with Multimodal Intervention	Gesundheitswesen	79	5	419-424	1			1
Naburi, H., Ekstrom, A. M., Mujinja, P., Kilewo, C., Manji, K., Biberfeld, G., Sando, D., Chalamila, G. and Barnighausen, T.	2017	The potential of task-shifting in scaling up services for prevention of mother-to-child transmission of HIV: a time and motion study in Dar es Salaam, Tanzania	Human Resources for Health	15		11	1			1
Rahman, A. E., Iqbal, A., Hoque, D. M. E., Moinuddin, M., Bin Zaman, S., Rahman, Q. S. U., Begum, T., Chowdhury, A. I., Haider, R., El Arifeen, S., Kissoon, N. and Larson, C. P.	2017	Managing Neonatal and Early Childhood Syndromic Sepsis in Sub-District Hospitals in Resource Poor Settings: Improvement in Quality of Care through Introduction of a Package of Interventions in Rural Bangladesh	Plos One	12	1	19	1			1
Restrepo-Escobar, M., Granda-Carvajal, P. A. and Jaimes, F.	2017	Systematic review of the literature on reproducibility of the interpretation of renal biopsy in lupus nephritis	Lupus	26	14	1502-1512	1			1
Rintoul, A., Deblaquiere, J. and Thomas, A.	2017	Responsible gambling codes of conduct: lack of harm minimisation intervention in the context of venue self-regulation	Addiction Research & Theory	25	6	451-461	1			1
Sando, D., Abuya, T., Asefa, A., Banks, K. P., Freedman, L. P., Kujawski, S., Markovitz, A., Ndwiga, C., Ramsey, K., Ratcliffe, H., Ugwu, E. O., Warren, C. E. and Jolivet, R. R.	2017	Methods used in prevalence studies of disrespect and abuse during facility based childbirth: lessons learned	Reproductive Health	14		18	1			1
Vanhelst, J., Beghin, L., Drumez, E., Coopman, S. and Gottrand, F.	2017	Awareness of wearing an accelerometer does not affect physical activity in youth	Bmc Medical Research Methodology	17		6	1			1
Zhang-Rutledge, K., Clark, S. L., Denning, S., Timmins, A., Dildy, G. A. and Gandhi, M.	2017	An Initiative to Reduce the Episiotomy Rate Association of Feedback and the Hawthorne Effect With Leapfrog Goals	Obstetrics and Gynecology	130	1	146-150	1			1
Zimmer, J., Hartl, S., Standfuss, K., Mohn, T., Bertsche, A., Frontini, R., Neininger, M. P. and Bertsche, T.	2017	Handling of hazardous drugs - Effect of an innovative teaching session for nursing students	Nurse Education Today	49		72-78	1			1
Arweiler, N. B., Auschill, T. M. and Sculean, A.	2018	Patient self-care of periodontal pocket infections	Periodontology 2000	76	1	164-179	1			1
Buyucek, N., Knox, K. and Rundle-Thiele, S.	2018	Observing alcohol drinking in licensed premises: a formative social marketing study	Journal of Social Marketing	8	1	40-57	1			1
Fahed, R., Lecler, A., Sabben, C., Khoury, N., Ducroux, C., Chalumeau, V., Botta, D., Kalsoum, E., Boisseau, W., Duron, L., Cabral, D., Koskas, P., Benaissa, A., Koulakian, H., Obadia, M., Maier, B., Weisenburger-Lile, D., Lapergue, B., Wang, A., Redjem, H., Ciccio, G., Smajda, S., Desilles, J. P., Mazighi, M., Ben Maacha, M., Akkari, I., Zuber, K., Blanc, R., Raymond, J. and Piotin, M.	2018	DWI-ASPECTS (Diffusion-Weighted Imaging-Alberta Stroke Program Early Computed Tomography Scores) and DWI-FLAIR (Diffusion-Weighted Imaging-Fluid Attenuated Inversion Recovery) Mismatch in Thrombectomy Candidates An Intrarater and Interrater Agreement Study	Stroke	49	1	223-+	1			1
Halloran, K. M., Gorman, K., Fallon, M. and Tovar, A.	2018	Nutrition Knowledge, Attitudes, and Fruit and Vegetable Intake as Predictors of Head Start Teachers' Classroom Mealtime Behaviors	Journal of Nutrition Education and Behavior	50	4	340-+	1			1
Jones, S., Gopalakrishnan, S., Ameh, C. A., Faragher, B., Sam, B., Labicane, R. R., Kanu, H., Dabo, F., Mansary, M., Kanu, R. and van den Broek, N.	2018	Student evaluation of the impact of changes in teaching style on their learning: a mixed method longitudinal study	Bmc Nursing	17		9	1			1
Lu, X. Q. and Davis, S.	2018	Priming effects on safety decisions in a virtual construction simulator	Engineering Construction and Architectural Management	25	2	273-294	1			1
McHaney, R., Tako, A. and Robinson, S.	2018	Using LIWC to choose simulation approaches: A feasibility study	Decision Support Systems	111		2018-12-01	1			1
Monnette, A., Zhang, Y. C., Shao, H. and Shi, L. Z.	2018	Concordance of Adherence Measurement Using Self-Reported Adherence Questionnaires and Medication Monitoring Devices: An Updated Review	Pharmacoeconomics	36	1	17-27	1			1
Nahiduzzaman, K. M., Aldosary, A. S., Abdallah, A. S., Asif, M., Kua, H. W. and Alqadhib, A. M.	2018	Households energy conservation in Saudi Arabia: Lessons learnt from change-agents driven interventions program	Journal of Cleaner Production	185		998-1014	1			1
Nordvik, O., Heggdal, P. O. L., Brannstrom, J., Vassbotn, F., Aarstad, A. K. and Aarstad, H. J.	2018	Generic quality of life in persons with hearing loss: a systematic literature review	Bmc Ear Nose and Throat Disorders	18		13	1			1
Rattray, M., Desbrow, B. and Roberts, S.	2018	Identifying errors in meals provided to and sourced by patients on therapeutic diets in hospital	Asia Pacific Journal of Clinical Nutrition	27	3	533-539	1			1
Speed, G., Harris, K. and Keegel, T.	2018	The effect of cushioning materials on musculoskeletal discomfort and fatigue during prolonged standing at work: A systematic review	Applied Ergonomics	70		300-314	1			1
Vass, C., Rigby, D., Tate, K., Stewart, A. and Payne, K.	2018	An Exploratory Application of Eye-Tracking Methods in a Discrete Choice Experiment	Medical Decision Making	38	6	658-672	1			1
Vredeveldt, A., Kesteloo, L. and van Koppen, P. J.	2018	Writing Alone or Together: Police Officers' Collaborative Reports of an Incident	Criminal Justice and Behavior	45	7	1071-1092	1			1
Walsh, C., Aquino, J., Seely, J., Kielar, A., Rakhra, K., Dennie, C., Sheikh, A., Kingstone, M., Hadziomerovic, A., McInnes, M., Shabana, W., Bright, C., Villemaire, M. and Rybicki, F. J.	2018	The Ottawa Hospital RADiologist Activity Reporting (RADAR) Productivity Metric: Effects on Radiologist Productivity	Canadian Association of Radiologists Journal-Journal De L Association Canadienne Des Radiologistes	69	1	71-77	1			1
							168	23	5	155
